# Supplementary material
Source: publisher figshare collection journal article supplement (https://acs.figshare.com/ndownloader/files/5157178)

# Supporting Information

## Synthesis of Disubstituted Imidazo[4,5-*b*]pyridin-2-ones

*Jeffrey T. Kuethe,\* Audrey Wong, and Ian W. Davies*

Department of Process Research, Merck & Co., Inc., P.O. Box 2000, rahway, NJ 070765

[Jeffrey\\_Kuethe@merck.com](mailto:Jeffrey_Kuethe@merck.com)

Melting points are uncorrected. All solvents and reagents were used as received from commercial sources. Analytical samples were obtained by chromatography on silica gel using an ethyl acetate-hexane mixture as the eluent unless specified otherwise. Water content (KF) was determined by Karl Fisher titration on a Metrohm 737 KF coulometer.

### Table of Contents

|                                                    |         |
|----------------------------------------------------|---------|
| Compound <b>4</b> .....                            | S2      |
| General Procedures for Compounds <b>5-27</b> ..... | S2-S3   |
| Compounds <b>5-27</b> .....                        | S3-S19  |
| General Procedure for Compounds <b>28-38</b> ..... | S19-20  |
| Compounds <b>28-38</b> .....                       | S20-S28 |
| NMR Spectra.....                                   | S29-S37 |

**Preparation of 2-Chloro-3-iodopyridine (4).** In a 12 L flask was charged 900 mL of 5N HCl and 101.30 g (0.79 mol) of 3-amino-2-chloropyridine. The mixture was cooled to -5 °C and 81.6 g (1.18 mol) of sodium nitrite in 350 mL of water was added dropwise while maintaining the internal temperature below 5 °C. After 10 min, 288.50 g (1.74 mol) of KI in 350 mL of water was added dropwise at -5 °C while maintaining the internal temperature below 10 °C over the course of the addition. The reaction mixture was warmed to rt and 1.50 L of EtOAc was added. The pH of the aqueous layer was adjusted to 11 by the addition of 650 mL of 6N NaOH, the layers were separated, and the organic layer was washed with 1.50 L of 0.3M Na<sub>2</sub>S<sub>2</sub>O<sub>3</sub>. The EtOAc layer was concentrated and the residue re-dissolved in 500 mL of DMF. To the reddish/brown mixture was added dropwise 1.50 L of water and the slurry stirred for 30 min and filtered. The filter cake was washed with water (2 X 500 mL) and then dried under vacuum/N<sub>2</sub> sweep to provide 173.3 g (92%) of **4** where the spectroscopic properties were identical to that reported in the literature.<sup>1</sup>

**General Procedure for the Preparation of 3-amino-2-chloropyridines:** To a slurry of 3.00 g (12.5 mmol) of 2-chloro-3-iodopyridine (**4**) in 31 mL of toluene was added sequentially 10.0 mg (0.376 mmol) of Pd(OAc)<sub>2</sub>, 84.0 mg (0.376 mmol) of *rac*-BINAP, 1.37 g (62.5 mmol) of solid Cs<sub>2</sub>CO<sub>3</sub>, 11.9 mmol of the appropriate amine, and 75 mg (0.752 mmol) of triethylamine. The resulting slurry was degassed (2X) by vacuum/N<sub>2</sub> backfills. The mixture was heated to reflux and monitored by TLC (EtOAc/hexane) for the disappearance of starting materials. After 18 h the reaction mixture was cooled to rt and 30 mL of H<sub>2</sub>O was added. The layers were separated and the toluene layer was

concentrated under reduced pressure. The residue could be used crude without further purification in the next reaction or purified by silica gel chromatography.

**General Procedure for the Preparation of Unsymmetrically Substituted Diamines:**

To 3.00 mmol of the appropriate 3-amino-2-chloropyridine in 12 mL of toluene was added sequentially 41.0 mg (0.0450 mmol) of  $\text{Pd}_2(\text{dba})_3$ , 84.0 mg (0.135 mmol) of *rac*-BINAP, 404 mg (4.20 mmol) of  $\text{NaOtBu}$ , and 3.60 mmol of the appropriate aniline. The reaction was degassed (2X) by vacuum/ $\text{N}_2$  backfills. The mixture was heated to reflux and monitored by TLC (25% EtOAc/hexane) for the disappearance of starting materials. After 18 h the reaction mixture was cooled to rt and concentrated under reduced pressure. The residue could be used crude without further purification in the next reaction or purified by silica gel chromatography.

**General Procedure for the Preparation of Imidazo[4,5-*b*]pyridin-2-ones:** To a solution of 1.0 mmol of the appropriate diamine in 6.7 mL of EtOAc or THF was added 2.5 mmol of triethylamine and 0.4 mmol of triphosgene. The resulting slurry was stirred at rt for 30 min and 7.0 mL of sat  $\text{NaHCO}_3$  was added. The layers were separated and the organic layer was concentrated under reduced pressure.. The residue was purified by silica gel chromatography or recrystallized from an ethyl acetate/hexane mixture.

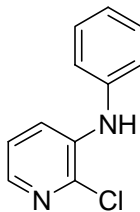

**5**

**Preparation of 2-Chloro-*N*-phenylpyridin-3-amine (5).** According to the general procedure for the preparation of 3-amino-2-chloropyridines, reaction of 7.00 g (29.23

mmol) of **4** with 2.63 g (28.25 mmol) of aniline gave 4.91 g (85%) of **5** which was used in the next step without further purification:  $^1\text{H}$  NMR ( $\text{CDCl}_3$ , 400 MHz)  $\delta$  6.15 (br s, 1H), 7.07-7.18 (m, 4H), 7.37 (t, 2H,  $J = 7.7$  Hz), 7.49 (d, 1H,  $J = 8.1$  Hz), 7.87 (d, 1H,  $J = 4.5$  Hz);  $^{13}\text{C}$  NMR ( $\text{CDCl}_3$ , 100 MHz)  $\delta$  121.2, 121.3, 123.9, 124.0, 129.7, 137.8, 139.4, 140.1, 151.8.

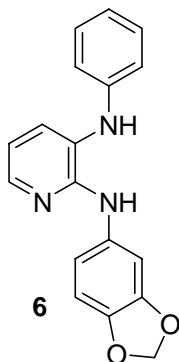

**Preparation of  $N^2$ -1,3-benzodioxol-5-yl- $N^3$ -phenylpyridin-2,3-diamine (**6**).**

According to the general procedure for the preparation of unsymmetrically substituted diamines, treatment of 2.20 g (10.8 mmol) of **5** with 1.77 g (12.9 mmol) of 3,4-(methylenedioxy)aniline afforded 2.63 g (80%) of **6** as an oil:  $^1\text{H}$  NMR ( $\text{CDCl}_3$ , 400 MHz)  $\delta$  5.22 (br s, 1H), 5.91 (s, 2H), 6.73 (m, 6H), 6.92 (t, 1H,  $J = 7.4$  Hz), 7.26 (m, 3H), 7.39 (dd, 1H,  $J = 7.6$  and 1.4 Hz), 8.06 (dd, 1H,  $J = 4.9$  and 1.6 Hz);  $^{13}\text{C}$  NMR ( $\text{CDCl}_4$ , 100 MHz)  $\delta$  101.1, 103.0, 108.2, 112.9, 114.9, 115.9, 120.5, 124.8, 129.6, 131.8, 135.0, 143.0, 144.1, 144.8, 147.8, 152.3; Anal. Calcd. For  $\text{C}_{13}\text{H}_{15}\text{N}_3\text{O}_2$ : C, 70.81; H, 4.95; N, 13.76. Found: C, 70.55; H, 5.03; N, 13.88.

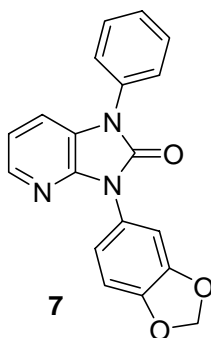

**Preparation of 3-(1,3-benzodioxol-5-yl)-1-phenyl-1,3-dihydro-2H-imidazo[4,5-*b*]pyridin-2-one (7).** According to the general procedure for the preparation of imidazo[4,5-*b*]pyridin-2-ones, treatment of 1.50 g (4.91 mmol) of diamine **6** with 583 mg (1.97 mmol) of triphosgene gave 1.58 g (97%) of **7** as a colorless solid: mp 175-176 °C;  $^1\text{H}$  NMR ( $\text{CDCl}_3$ , 400 MHz)  $\delta$  6.03 (s, 2H), 6.96 (d, 1H,  $J = 7.7$  Hz), 7.05 (dd, 1H,  $J = 7.7$  and 5.2 Hz), 7.20 (m, 2H), 7.35 (d, 1H,  $J = 7.7$  Hz), 7.44 (m, 1H), 7.57 (m, 4H), 8.11 (d, 1H,  $J = 5.2$  Hz);  $^{13}\text{C}$  NMR ( $\text{CDCl}_3$ , 100 MHz)  $\delta$  101.8, 107.9, 108.6, 115.0, 117.9, 120.3, 123.8, 125.7, 126.7, 128.1, 129.8, 133.9, 141.7, 143.7, 147.4, 148.2, 151.9; Anal. Calcd. For  $\text{C}_{19}\text{H}_{13}\text{N}_3\text{O}_3$ : C, 68.88; H, 3.95; N, 12.68. Found: C, 68.77; H, 3.86; N, 12.73.

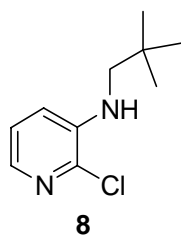

**2-Chloro-N-(2,2-dimethylpropyl)pyridin-3-amine (8).** According to the general procedure for the preparation of 3-amino-2-chloropyridines, reaction of 5.00 g (20.9 mmol) of **4** with 1.73 g (19.8 mmol) of neopentyl amine afforded 2.96 g (75%) of **8** which was used in the next step without further purification:  $^1\text{H}$  NMR ( $\text{CDCl}_3$ , 400 MHz)  $\delta$  1.04 (s, 9H), 2.94 (d, 2H,  $J = 6.0$  Hz), 4.42 (br s, 1H), 6.91 (dd, 1H,  $J = 8.0$  and

1.6 Hz), 7.08 (dd, 1H,  $J = 8.0$  and 4.4 Hz), 7.68 (dd, 1H,  $J = 4.8$  and 1.6 Hz);  $^{13}\text{C}$  NMR ( $\text{CDCl}_3$ , 100 MHz)  $\delta$  27.6, 32.1, 50.6, 117.2, 123.4, 135.9, 137.0, 141.5.

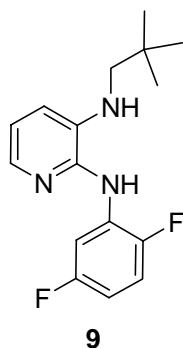

**$N^2$ -(2,5-Difluorophenyl)- $N^3$ -(2,2-dimethylpropyl)pyridine-2,3-diamine (9).** According to the general procedure for the preparation of unsymmetrically substituted diamines, treatment of 500 mg (2.52 mmol) of **8** with 320 mg (2.5 mmol) of 2,5-difluoroaniline gave 462 mg (63%) of **9** which was used in the next step without further purification.  $^1\text{H}$  NMR ( $\text{CDCl}_3$ , 400 MHz)  $\delta$  1.04 (s, 9H), 2.86 (d, 2H,  $J = 6.4$  Hz), 3.26 (br t, 1H,  $J = 6.0$  Hz), 6.54 (m, 1H), 6.90 (dd, 1H,  $J = 8.0$  and 4.8 Hz), 7.02 (m, 2H), 7.34 (br s, 1H), 7.78 (m, 1H), 7.84 (dd, 1H,  $J = 4.8$  and 1.6 Hz).

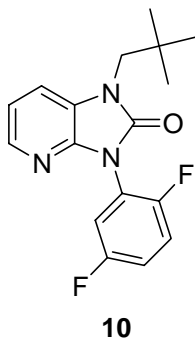

**3-(2,5-Difluorophenyl)-1-(2,2-dimethylpropyl)-1,3-dihydro-2H-imidazo[4,5-*b*]pyridin-2-one (10).** According to the general procedure for the preparation of imidazo[4,5-*b*]pyridin-2-ones, treatment of 730 mg (2.51 mmol) of diamine **9** with 430 mg (1.45 mmol) of triphosgene yielded 572 mg (72%) of **10** as a yellow crystalline solid:

mp 149-150 °C;  $^1\text{H}$  NMR ( $\text{CDCl}_3$ , 400 MHz)  $\delta$  1.10 (s, 9 H), 3.74 (s, 2H), 7.09 (dd, 1H,  $J$  = 7.6 and 5.2 Hz), 7.16 (m, 1H), 7.29 (m, 3H), 8.05 (dd, 1H,  $J$  = 5.2 and 1.2 Hz);  $^{13}\text{C}$  NMR ( $\text{CDCl}_3$ , 100 MHz,)  $\delta$  28.2, 34.6, 53.2, 115.3, 116.9 (d,  $J$  = 25.7 Hz), 117.0 (dd,  $J$  = 24.1 and 8.0 Hz), 117.7 (dd,  $J$  = 22.5 and 8.8 Hz), 118.0, 121.6 (dd,  $J$  = 15.4 and 10.4 Hz), 125.6, 140.8, 142.9, 152.8, 154.4 (dd,  $J$  = 249.0 and 2.4 Hz), 158.4 (dd,  $J$  = 247.4 and 2.8 Hz).  $^{19}\text{F}$  NMR ( $\text{CDCl}_3$ , 376 MHz)  $\delta$  -124.0 (d,  $J$  = 15.5 Hz), -177.4 (d,  $J$  = 15.5 Hz); Anal. Calcd. For  $\text{C}_{17}\text{H}_{17}\text{F}_2\text{N}_3\text{O}$ : C, 64.34; H, 5.40; N, 13.24. Found: C, 64.20; H, 5.19; N, 13.13.

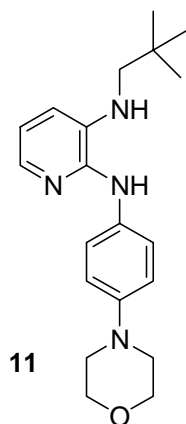

***N*<sup>3</sup>-(2,2-Dimethylpropyl)-*N*<sup>2</sup>-(4-morpholin-4-ylphenyl)pyridine-2,3-diamine (11).**

According to the general procedure for the preparation of unsymmetrically substituted diamines, treatment of 450 mg (2.26 mmol) of **8** with 540 mg (3.00 mmol) of 4-morpholinoaniline gave 520 mg (67%) of **11** which was used in the next step without further purification.  $^1\text{H}$  NMR ( $\text{CDCl}_3$ , 400 MHz)  $\delta$  0.97 (s, 9H), 2.83 (d, 2H,  $J$  = 5.2 Hz), 3.09 (m, 4H), 3.32 (br t, 1H,  $J$  = 5.6 Hz), 3.87 (m, 4H), 6.13 (br s, 1H), 6.81 (dd, 1H,  $J$  = 7.8 and 5.0 Hz), 6.90 (m, 2H), 6.93 (dd, 1H,  $J$  = 7.8 and 1.4 Hz), 7.15 (m, 2H), 7.72 (dd,

1H,  $J = 5.0$  and  $1.4$  Hz);  $^{13}\text{C}$  NMR ( $\text{CDCl}_3$ , 100 MHz,)  $\delta$  27.7, 31.7, 50.6, 56.1, 67.1, 117.2, 117.3, 118.3, 120.6, 134.5, 135.0, 136.8, 146.0, 146.8.

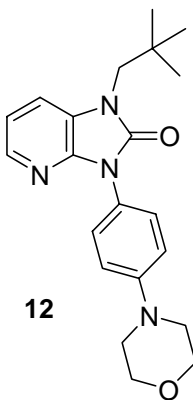

**1-(2,2-Dimethylpropyl)-3-(4-morpholin-4-ylphenyl)-1,3-dihydro-2H-imidazo[4,5-*b*]pyridin-2-one (12).** According to the general procedure for the preparation of imidazo[4,5-*b*]pyridin-2-ones, treatment of 380 mg (1.11 mmol) of diamine **11** with 200 mg (0.674 mmol) of triphosgene gave 370 mg (90%) of **12** as a white solid: mp  $172\text{ }^{\circ}\text{C}$ ;  $^1\text{H}$  NMR ( $\text{CDCl}_3$ , 400 MHz)  $\delta$  1.09 (s, 9H), 3.22 (m, 4H), 3.73 (s, 2H), 3.90 (m, 4H), 7.03 (dd, 1H,  $J = 8.0$  and  $5.2$  Hz), 7.07 (m, 2H), 7.27 (dd, 1H,  $J = 7.8$  and  $1.4$  Hz), 7.59 (m, 2H), 8.05 (dd, 1H,  $J = 5.0$  and  $1.4$  Hz);  $^{13}\text{C}$  ( $\text{CDCl}_3$ , 100 MHz)  $\delta$  28.3, 34.6, 49.4, 53.0, 66.8, 114.6, 116.2, 116.3, 117.2, 125.3, 126.9, 140.6, 143.6, 150.4, 153.8; Anal. Calcd. For  $\text{C}_{21}\text{H}_{26}\text{N}_4\text{O}_2$ : C, 68.83; H, 7.15; N, 15.29. Found: C, 68.43; H, 7.04; N, 15.05.

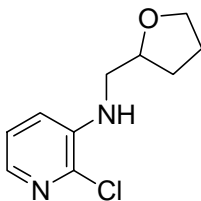

**13**



**2-Chloro-*N*-(tetrahydrofuran-2-ylmethyl)pyridin-3-amine (13).** According to the general procedure for the preparation of 3-amino-2-chloropyridines, reaction of 5.00 g (20.9 mmol) of **4** with 2.01 g (19.9 mmol) of tetrahydrofurfuryl amine afforded 3.12 g (74%) of **13** as a yellow oil:  $^1\text{H}$  NMR ( $\text{CDCl}_3$ , 400 MHz)  $\delta$  1.68 (m, 1H), 1.06 (m, 2H), 2.07 (m, 1H), 3.15 (m, 1H), 3.30 (m, 1H), 3.81 (m, 1H), 3.92 (m, 1H), 4.16 (m, 1H), 4.68 (br t, 1H,  $J = 6.0$  Hz), 6.92 (dd, 1H,  $J = 8.0$  and 1.6 Hz), 7.08 (dd, 1H,  $J = 8.0$  and 4.4 Hz), 7.72 (dd, 1H,  $J = 4.8$  and 1.6 Hz);  $^{13}\text{C}$  NMR ( $\text{CDCl}_3$ , 100 MHz,)  $\delta$  25.9, 29.2, 47.4, 68.4, 77.3, 117.5, 123.3, 136.5, 137.4, 141.1. HRMS (EI) calcd for ( $\text{M} + \text{H}^+$ )  $\text{C}_{10}\text{H}_{13}\text{ClNO}$ : 213.0795. Found: 213.0795.

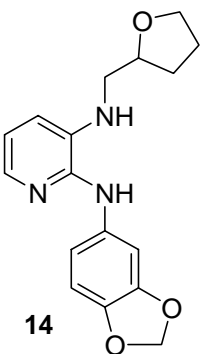

***N*<sup>2</sup>-1,3-Benzodioxol-5-yl-*N*<sup>3</sup>-(tetrahydrofuran-2-ylmethyl)pyridin-2,3-diamine (14).**

According to the general procedure for the preparation of unsymmetrically substituted diamines, reaction of 500 mg (2.35 mmol) of **13** with 310 mg (2.30 mmol) of 3,4-(methylenedioxy)aniline gave 574 mg (78%) of **14** which was used in the next step without further purification:  $^1\text{H}$  NMR ( $\text{CDCl}_3$ , 400 MHz)  $\delta$  1.67 (m, 1H), 1.95 (quint, 2H,  $J = 6.8$  Hz), 2.06 (m, 1H), 3.05 (dd, 1H,  $J = 12.0$  and 7.6 Hz), 3.19 (dd, 1H,  $J = 12.2$  and 3.4 Hz), 3.68 (br s, 1H), 3.81 (m, 1H), 3.89 (m, 1H), 4.18 (m, 1H), 5.93 (s, 2H), 6.34 (br s, 1H), 6.66 (dd, 1H,  $J = 8.4$  and 2.0 Hz), 6.74 (d, 1H,  $J = 8.0$  Hz), 6.77 (dd, 1H,  $J = 7.6$  and 5.2 Hz), 6.94 (dd, 1H,  $J = 7.6$  and 1.6 Hz), 7.04 (d, 1H,  $J = 2.4$  Hz), 7.77 (dd, 1H,  $J$

= 4.8 and 1.4 Hz);  $^{13}\text{C}$  NMR ( $\text{CDCl}_3$ , 100 MHz)  $\delta$  25.9, 29.2, 48.9, 68.2, 77.5, 101.0, 102.5, 108.2, 112.1, 116.5, 119.3, 133.0, 136.1, 137.8, 142.6, 146.8, 147.9.

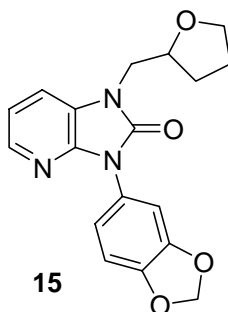

**3-(1,3-Benzodioxol-5-yl)-1-(tetrahydrofuran-2-yl-methyl)-1,3-dihydro-2H-imidazo[4,5-*b*]pyridin-2-one (15).** According to the general procedure for the preparation of imidazo[4,5-*b*]pyridin-2-ones, treatment of 740 mg (2.36 mmol) of diamine **14** with 280 mg (0.943 mmol) of triphosgene gave 270 mg (65%) of **15** as an oil:  $^1\text{H}$  NMR ( $\text{CDCl}_3$ , 400MHz)  $\delta$  1.67 (m, 1H), 1.81 (quint, 2H), 2.00 (m, 1H), 3.66 (q, 1H,  $J$  = 7.4 Hz), 3.76 (q, 1H,  $J$  = 6.8 Hz), 3.85 (dd, 1H,  $J$  = 14.9 and 3.8 Hz), 4.03 (m, 1H), 4.20 (m, 1H), 5.92 (s, 2H), 6.85 (d, 1H,  $J$  = 8.8 Hz), 6.96 (dd, 1H,  $J$  = 7.63 and 5.2 Hz), 7.06 (m, 2H), 7.38 (dd, 1H,  $J$  = 7.6 and 1.2 Hz), 7.95 (dd, 1H,  $J$  = 5.2 and 1.2 Hz);  $^{13}\text{C}$  NMR ( $\text{CDCl}_3$ , 100 MHz)  $\delta$  25.8, 28.8, 45.4, 68.2, 77.8, 101.7, 107.7, 108.3, 115.5, 117.8, 120.0, 124.5, 127.0, 140.8, 143.4, 147.1, 148.0, 153.1; HRMS (EI) calcd for ( $\text{M} + \text{H}^+$ ) for 340.1295. Found: 340.1297.

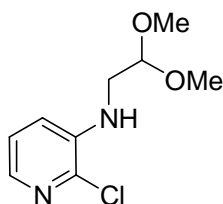

**16**

**2-Chloro-*N*-(2,2-dimethoxyethyl)pyridin-3-amine (16).** According to the general procedure for 3-amino-2-chloropyridines, reaction of 5.00 g (20.9 mmol) of **4** with 2.08 g

(19.9 mmol) of aminoacetaldehyde dimethyl acetal afforded 3.18 g (74%) of **16** as a yellow oil:  $^1\text{H}$  NMR ( $\text{CDCl}_3$ , 400 MHz)  $\delta$  3.29 (t, 2H,  $J = 5.6$  Hz), 3.45 (s, 6H), 4.58 (br s, 1H), 4.59 (t, 1H,  $J = 5.4$  Hz), 6.93 (dd, 1H,  $J = 7.6$  and 1.4 Hz), 7.10 (dd, 1H,  $J = 8.0$  and 4.8 Hz), 7.74 (dd, 1H,  $J = 4.8$  and 1.6 Hz);  $^{13}\text{C}$  NMR ( $\text{CDCl}_3$ , 100 MHz)  $\delta$  45.0, 54.2, 102.5, 117.7, 123.4, 136.7, 137.4, 140.6; Anal. Calcd. for  $\text{C}_9\text{H}_{13}\text{ClN}_2\text{O}_2$ : C, 49.89; H, 6.05; N, 12.93. Found: C, 50.22; H, 5.80; N, 12.71.

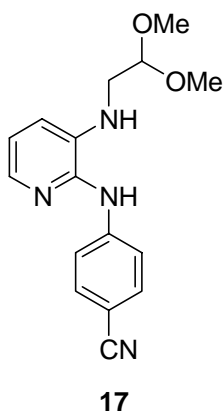

**4-({3-[(2,2-Dimethoxyethyl)amino]pyridin-2-yl}amino)benzonitrile (17).** According to the general procedure for preparation of unsymmetrically substituted diamines, treatment of 600 mg (2.77mmol) of **16** with 340 mg (2.88 mmol) of 4-aminobenzonitrile gave 719 mg (87%) of **17** which was used in the next step without further purification:  $^1\text{H}$  NMR ( $\text{CDCl}_3$ , 400MHz)  $\delta$  3.20 (t, 2H,  $J = 5.6$  Hz), 3.40 (s, 6H), 3.72 (br t, 1H,  $J = 5.6$  Hz), 4.56 (t, 1H,  $J = 5.2$  Hz), 6.90 (dd, 1H,  $J = 8.0$  and 4.8 Hz), 6.92 (br s, 1H), 7.00 (dd, 1H,  $J = 7.6$  and 1.2 Hz), 7.30 (dt, 2H,  $J = 8.8$  and 2.2 Hz), 7.45 (dt, 2H,  $J = 8.8$  and 2.2 Hz), 7.81 (dd, 1H,  $J = 4.8$  and 1.6 Hz);  $^{13}\text{C}$  NMR ( $\text{CDCl}_3$ , 100 MHz,)  $\delta$  46.0, 54.2, 102.6, 102.8, 117.4, 119.1, 120.0, 120.4, 133.2, 134.3, 137.7, 143.9, 146.1.

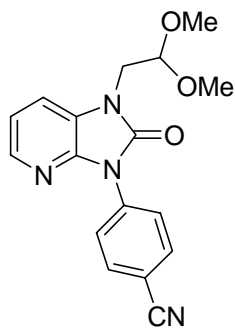

**18**

**4-[1-(2,2-Dimethoxyethyl)-2-oxo-1,2-dihydro-3H-imidazo[4,5-*b*]pyridin-3-yl]benzonitrile (18).** According to the general procedure for the preparation of imidazo[4,5-*b*]pyridin-2-ones, treatment of 830 mg (2.77 mmol) of **17** with 330 mg (1.11 mmol) of triphosgene gave 720 mg (80%) of **18** as an off-white solid. mp 113-114 °C, <sup>1</sup>H NMR (CDCl<sub>3</sub>, 400 MHz) δ 3.46 (s, 6H), 4.06 (d, 2H, *J* = 4.8 Hz), 4.65 (t, 1H, *J* = 4.8 Hz), 7.14 (dd, 1H, *J* = 8.0 and 5.2 Hz), 7.46 (dd, 1H, *J* = 7.8 and 1.2 Hz), 7.81 (dt, 2H, *J* = 9.2 and 2.0 Hz), 8.09 (dd, 1H, *J* = 5.0 and 1.6 Hz), 8.12 (dt, 2H, *J* = 8.8 and 2.0 Hz); <sup>13</sup>C NMR (CDCl<sub>3</sub>, 100 MHz,) δ 43.6, 55.3, 102.9, 110.4, 116.0, 118.5, 118.8, 124.6, 125.3, 133.0, 138.0, 141.0, 142.3, 152.2; Anal. Calcd. for C<sub>17</sub>H<sub>16</sub>N<sub>4</sub>O<sub>3</sub>: C, 62.95; H, 4.95; N, 17.27. Found: C, 62.84; H, 4.80; N 17.14.

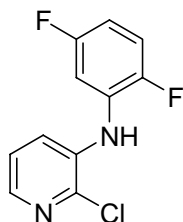

**19**

**2-Chloro-*N*-(2,5-difluorophenyl)pyridin-3-amine (19).** According to the general procedure for the preparation of 3-amino-2-chloropyridines, reaction of 700 mg (2.9 mmol) of **4** with 370 mg (2.87mmol) of 2,5-difluoroaniline afforded 580 mg (84%) of **19** as a white solid: mp 109-110 °C; <sup>1</sup>H NMR (CDCl<sub>3</sub>, 400 MHz) δ 6.22 (br s, 1H), 6.69 (m,

1H), 6.99 (m, 1H), 7.10 (m, 1H), 7.18 (m, 1H), 7.54 (dd, 1H,  $J = 8.0$  and  $1.2$  Hz), 7.9 (dd, 1H,  $J = 4.8$  and  $1.8$  Hz);  $^{13}\text{C}$  NMR ( $\text{CDCl}_3$ , 100 MHz,)  $\delta$  106.3 (d,  $J = 27.3$  Hz), 109.1 (dd,  $J = 24.1$  and  $7.2$  Hz), 116.6 (dd,  $J = 22.1$  and  $10.0$  Hz), 123.1, 123.3, 130.0 (dd,  $J = 12.8$  and  $11.2$  Hz), 135.6, 140.4, 141.2, 150.3 (dd,  $J = 240.1$  and  $2.4$  Hz), 158.9 (dd,  $J = 242.8$  and  $2.4$  Hz);  $^{19}\text{F}$  NMR ( $\text{CDCl}_3$ , 376 MHz)  $\delta$  -135.0 (d,  $J = 15.5$  Hz), -117.0 (d,  $J = 15.5$  Hz). Anal. Calcd. for  $\text{C}_{11}\text{H}_7\text{ClF}_2\text{N}_2$ : C, 54.90; H, 2.93; N, 11.64. Found: C, 54.81; H, 2.74; N, 11.47.

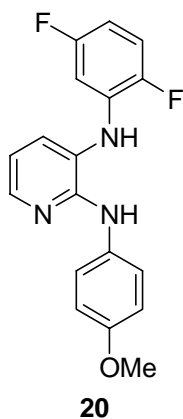

**$N^3$ -(2,5-Difluorophenyl)- $N^2$ -(4-methoxyphenyl)pyridine-2,3-diamine (20).** According to the general procedure for the preparation of unsymmetrically substituted diamines, treatment of 250 mg (1.04 mmol) of **19** with 130 mg (2.5 mmol) of *p*-anisidine provided 190 mg (56%) of **20** as a fluffy white solid: mp 116-117 °C;  $^1\text{H}$  NMR ( $\text{CDCl}_3$ , 400 MHz)  $\delta$  3.79 (s, 3H), 5.47 (br s, 1H), 6.38 (m, 1H), 6.47 (m, 1H), 6.74 (dd, 1H,  $J = 7.6$  and  $4.8$  Hz), 6.78 (br s, 1H), 6.87 (m, 2H), 7.03 (m, 1H), 7.39 (dd, 1H,  $J = 7.8$  and  $1.2$  Hz), 7.43 (m, 2H), 8.12 (dd, 1H,  $J = 4.8$  and  $1.6$  Hz);  $^{13}\text{C}$  NMR ( $\text{CDCl}_3$ , 100 MHz,)  $\delta$  55.6, 102.5 (dd,  $J = 28.9$  and  $2.1$  Hz), 105.3 (dd,  $J = 24.0$  and  $7.2$  Hz), 114.3 114.6, 115.7 (dd,  $J = 20.9$  and  $10.4$  Hz), 121.9, 122.3, 133.3, 133.5, 124.9 (dd,  $J = 11.4$  and  $12.8$ ), 145.6, 148.3 (d,  $J = 235.0$  Hz), 153.2, 155.6, 159.5 (d,  $J = 240.9$  Hz);  $^{19}\text{F}$  NMR ( $\text{CDCl}_3$ ,

376 MHz)  $\delta$  -140.9 (d,  $J$  = 15.5 Hz), -117.3 (d,  $J$  = 17.2 Hz); Anal. Calcd for  $C_{18}H_{15}F_2N_3O$ : C, 66.05; H, 4.62; N, 12.84. Found: C, 65.82; H, 4.45; N 12.60.

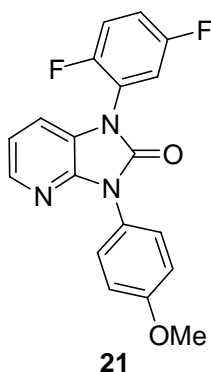

**1-(2,5-Difluorophenyl)-3-(4-methoxyphenyl)-1,3-dihydro-2H-imidazo[4,5-*b*]pyridin-2-one (21).** According to the general procedure for the preparation of imidazo[4,5-*b*]pyridin-2-ones, treatment of 160 mg (0.49 mmol) of **20** with 58.0 mg (0.195 mmol) of triphosgene gave 150 mg (88%) of **21** as a fluffy white solid: mp 172-173 °C;  $^1H$  NMR ( $CDCl_3$ , 400 MHz)  $\delta$  3.88 (s, 3H), 7.08 (m, 3H), 7.19 (m, 2H), 7.31 (m, 1H), 7.38 (m, 1H), 7.64 (m, 2H), 8.15 (dd, 1H,  $J$  = 5.0 and 1.4 Hz);  $^{13}C$  NMR ( $CDCl_3$ , 100 MHz,)  $\delta$  55.6, 114.7, 115.4, 116.3 (d,  $J$  = 25.7 Hz), 117.1 (dd,  $J$  = 23.7 and 7.6 Hz), 117.99 (dd,  $J$  = 22.9 and 9.2 Hz), 118.01, 123.4, 125.6, 127.6, 137.2, 142.1, 143.7, 151.2, 153.8, (dd, 249.0 and 3.2 Hz), 158.5 (dd,  $J$  = 248.0 and 2.4 Hz), 159.3;  $^{19}F$  NMR ( $CDCl_3$ , 376 MHz)  $\delta$  -123.9 (d,  $J$  = 15.5), -116.4 (d,  $J$  = 15.5 Hz). Anal. Calcd. for  $C_{19}H_{13}F_2N_3O_2$ : C, 64.59; H, 3.71; N, 11.89. Found: C, 64.38; H, 3.39; N, 11.81.

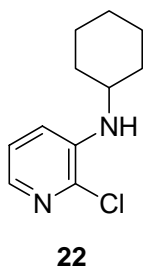

**Preparation of 2-Chloro-*N*-cyclohexylpyridin-3-amine (22).** According to the general procedure for the preparation of 3-amino-2-chloropyridines, reaction of 8.00 g (33.4 mmol) of **4** with 3.14 g (31.7 mmol) of cyclohexylamine gave 5.67 g (85%) of **22** as a colorless solid: mp 44-45 °C; <sup>1</sup>H NMR (CDCl<sub>3</sub>, 400 MHz) δ 1.26 (m, 5H), 1.63 (m, 1H), 1.75 (m, 2H), 2.02 (m, 2H), 3.24 (m, 1H), 4.25 (br s, 1H), 6.86 (dd, 1H, *J* = 8.1 and 1.5 Hz), 7.04 (dd, 1H, *J* = 8.1 and 4.6 Hz), 7.64 (dd, 1H, *J* = 4.6 and 1.5 Hz); <sup>13</sup>C NMR (CDCl<sub>3</sub>, 100 MHz) δ 24.7, 25.7, 32.8, 51.1, 117.6, 123.3, 135.7, 136.9, 139.9; Anal. Calcd. For C<sub>11</sub>H<sub>15</sub>ClN<sub>2</sub>: C, 62.70; H, 7.18; N, 13.30. Found: C, 63.00; H, 7.28; N, 13.14.

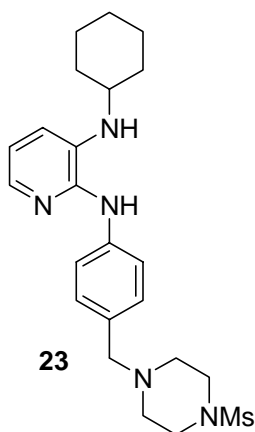

**Preparation of *N*<sup>3</sup>-Cyclohexyl-*N*<sup>2</sup>-(4-{[4-(methylsulfonyl)piperazin-1-yl]methyl}phenyl)pyridine-2,3-diamine (23).** A solution of 1.00 g (4.63 mmol) of 4-nitrobenzyl bromide in 5 mL of isopropyl acetate was added dropwise over a period of 20 min to a stirred solution of 4 g (46.4 mmol) of piperazine in 8 mL of 95% EtOH. The resulting suspension was allowed to stir at rt for 30 min, filtered over a pad of celite and concentrated under reduced pressure. The residue was dissolved in 30 mL of isopropyl acetate and washed with 25 mL of water. The isopropyl acetate layer was separated and concentrated to a final volume of 20 mL. To the solution was added 610 mg (6.01 mmol)

of  $\text{NEt}_3$  followed by 560 mg (4.86 mmol) of methanesulfonyl chloride. After stirring for 30 min the reaction mixture was filtered over a pad of celite and concentrated to a final volume of 20 mL. To the resulting mixture was added 20 mL of heptane and the slurry of the product was stirred for 20 min and filtered affording 900 mg (65%) of 1-methanesulfonyl-4-(4-nitrobenzyl)-piperazine as a colorless solid: mp 116-117 °C;  $^1\text{H}$  NMR ( $\text{CDCl}_3$ , 400 MHz)  $\delta$  2.58 (m, 4H), 2.80 (s, 3H), 3.27 (m, 4H), 3.65 (s, 2H), 7.51 (d, 2H,  $J = 8.8$  Hz), 8.18 (d, 2H,  $J = 8.8$  Hz);  $^{13}\text{C}$  NMR ( $\text{CDCl}_3$ , 100 MHz)  $\delta$  34.5, 46.0, 52.6, 61.8, 123.8, 129.6, 145.7, 147.5; Anal. Calcd. For  $\text{C}_{12}\text{H}_{17}\text{N}_3\text{O}_4\text{S}$ : C, 48.15; H, 5.72; N, 14.04. Found: C, 48.16; H, 5.52; N, 13.91.

To a solution of 25.0 g (83.5 mmol) of the above nitrocompound in 1.50 L of EtOAc was added 5.00 g of 5% Pd/C. The resulting mixture stirred at rt under an atmosphere of hydrogen (15 psi) for 4 h. The reaction mixture was filtered over a pad of celite and concentrated to a solid under reduced pressure to give 19.0 g (84%) of 4-(4-methanesulfonyl-piperazin-1-ylmethyl)aniline as a colorless solid: mp 161-162 °C;  $^1\text{H}$  NMR ( $\text{CDCl}_3$ , 400 MHz)  $\delta$  2.52 (m, 4H), 2.76 (s, 3H), 3.22 (m, 4H), 3.42 (s, 2H), 3.67 (br s, 2H), 6.63 (d, 2H,  $J = 8.4$  Hz), 7.06 (d, 2H,  $J = 8.4$  Hz);  $^{13}\text{C}$  NMR ( $\text{CDCl}_3$ , 100 MHz)  $\delta$  34.1, 46.0, 52.1, 62.3, 115.0, 127.2, 130.4, 145.8; Anal. Calcd. For  $\text{C}_{12}\text{H}_{19}\text{N}_3\text{O}_2\text{S}$ : C, 53.51; H, 7.11; N, 15.60. Found: C, 53.71; H, 7.09; N, 15.48.

According to the general procedure for the preparation of unsymmetrically substituted diamines, treatment of 250 mg (1.19 mmol) of **22** with 380 mg (1.41 mmol) of the above aniline afforded 504 mg (95%) of **23** as an oil:  $^1\text{H}$  NMR ( $\text{CDCl}_3$ , 400 MHz)  $\delta$  1.21 (m, 3H), 1.31 (m, 2H), 1.65 (m, 1H), 1.73 (m, 2H), 1.99 (m, 2H), 2.54 (m, 4H), 2.76 (s, 3H), 3.22 (m, 6H), 3.47 (s, 2H), 6.24 (br s, 1H), 6.82 (m, 1H), 6.95 (dd, 1H,  $J = 7.7$  and 1.3



Hz), 7.19 (s, 4H), 7.75 (dd, 1H,  $J = 4.9$  and  $1.3$  Hz);  $^{13}\text{C}$  NMR ( $\text{CDCl}_3$ , 100 MHz)  $\delta$  24.8, 25.9, 33.2, 34.1, 45.9, 52.0, 51.1, 62.2, 117.6, 118.1, 119.8, 129.9, 133.0, 136.9, 141.1, 145.5.

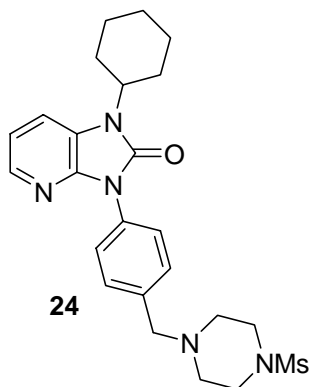

**Preparation of 1-Cyclohexyl-3-(4-([4-(methylsulfonyl)piperazin-1-yl]methyl)phenyl)-1,3-dihydro-2H-imidazo[4,5-*b*]pyridin-2-one (24).** According to the general procedure for the preparation of imidazo[4,5-*b*]pyridin-2-ones, treatment of 410 mg (0.924 mmol) of **23** with 110 mg (0.370 mmol) of triphosgene gave 410 mg (94%) of **24** as a yellow foam:  $^1\text{H}$  NMR ( $\text{CDCl}_3$ , 400 MHz)  $\delta$  1.29 (m, 1H), 1.46 (m, 2H), 1.76 (m, 1H), 1.96 (m, 4H), 2.10 (m, 2H), 2.58 (m, 4H), 2.77 (s, 3H), 3.24 (m, 4H), 3.58 (s, 2H), 4.37 (m, 1H), 7.03 (dd, 1H,  $J = 8.0$  and  $5.2$  Hz), 7.45 (m, 3H), 7.65 (d, 2H,  $J = 8.4$  Hz), 8.02 (dd, 1H,  $J = 5.2$  and  $1.3$  Hz);  $^{13}\text{C}$  NMR ( $\text{CDCl}_3$ , 100 MHz)  $\delta$  25.4, 25.9, 30.3, 34.3, 46.0, 52.4, 53.2, 62.2, 115.4, 117.4, 123.0, 126.0, 129.7, 132.7, 136.9, 140.3, 143.3, 152.3; Anal. Calcd. For  $\text{C}_{24}\text{H}_{31}\text{N}_5\text{O}_3\text{S}$ : C, 61.38; H, 6.65; N, 14.91. Found: C, 61.57; H, 6.87; N, 14.79.

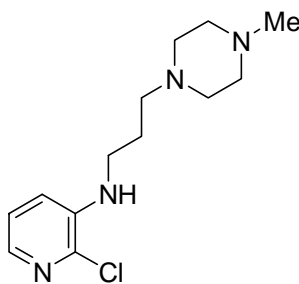

**25**

**Preparation of 2-Chloro-*N*-[3-(4-methylpiperazin-1-yl)propyl]pyridin-3-amine (25).**

According to the general procedure for the preparation of 3-amino-2-chloropyridines, reaction of 8.01 g (33.45 mmol) of **4** with 5.00 g (31.79 mmol) of 1-(3-aminopropyl)-4-methylpiperazine gave 7.09 g (83%) of **25** as an oil which was used in the next step without further purification:  $^1\text{H}$  NMR ( $\text{CDCl}_3$ , 400 MHz)  $\delta$  1.83 (m, 2H), 2.28 (s, 3H), 2.49 (m, 10H), 3.18 (m, 2H), 5.68 (br s, 1H), 6.82 (m, 1H), 7.04 (m, 1H), 7.65 (m, 1H);  $^{13}\text{C}$  NMR ( $\text{CDCl}_3$ , 100 MHz)  $\delta$  24.8, 43.4, 46.1, 53.5, 54.9, 57.5, 116.9, 123.3, 135.7, 137.1, 141.4.

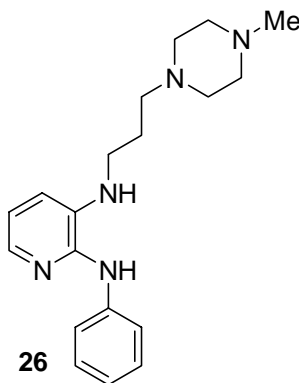

**26**

**Preparation of *N*<sup>3</sup>-[3-(4-Methylpiperazin-1-yl)propyl]-*N*<sup>2</sup>-phenylpyridine-2,3-diamine (26).**

According to the general procedure for the preparation of unsymmetrically substituted diamines, treatment of 1.40 g (5.21 mmol) of **25** with 613 mg (6.58 mmol) of aniline afforded 1.34 g (79%) of **26** as a clear oil:  $^1\text{H}$  NMR ( $\text{CDCl}_3$ , 400 MHz)  $\delta$  1.85 (m, 2H), 2.11 (s, 3H), 2.50 (m, 10H), 3.18 (t, 2H,  $J = 6.0$  Hz), 5.09 (br s,

1H), 6.03 (br s, 1H), 6.81 (m, 1H), 6.87 (m, 1H), 6.93 (m, 1H), 7.27 (m, 4H), 7.73 (m, 1H); <sup>13</sup>C NMR (CDCl<sub>3</sub>, 100 MHz) δ 25.2, 44.5, 45.8, 53.5, 55.1, 58.1, 117.1, 117.4, 118.9, 121.4, 128.9, 134.5, 136.2, 141.5, 145.2.

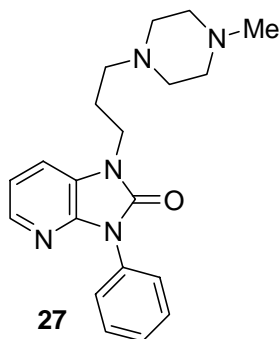

**Preparation of 1-[3-(4-methylpiperazin-1-yl)propyl]-3-phenyl-1,3-dihydro-2H-imidazo[4,5-*b*]pyridin-2-one (27)<sup>2</sup>.** According to the general procedure for the preparation of imidazo[4,5-*b*]pyridin-2-ones, treatment of 1.00 g (3.07 mmol) of **26** with 364 mg (1.23 mmol) of triphosgene gave 993 mg (92%) of **27**<sup>2</sup> as an oil: <sup>1</sup>H NMR (CDCl<sub>3</sub>, 400 MHz) δ 1.98 (m, 2H), 2.31 (s, 3H), 2.44 (m, 10H), 4.01 (t, 2H, *J* = 6.8 Hz), 7.04 (dd, 1H, *J* = 7.8 and 5.2 Hz), 7.23 (m, 1H), 7.41 (m, 1H), 7.51 (t, 2H, *J* = 8.0 Hz), 7.73 (m, 2H), 8.04 (dd, 1H, *J* = 5.2 and 1.2 Hz); <sup>13</sup>C NMR (CDCl<sub>3</sub>, 100 MHz) δ 25.3, 39.1, 45.7, 52.6, 54.9, 55.0, 113.9, 117.6, 124.1, 125.7, 127.5, 129.1, 133.4, 140.6, 143.2, 152.6; Anal. Calcd. For C<sub>20</sub>H<sub>25</sub>N<sub>5</sub>O: C, 68.35; H, 7.17; N, 19.93. Found: C, 68.14; H, 6.98; N, 19.92.

**General Procedure for Symmetrically Substituted Diamines:** To 3.00 g (12.5 mmol) of 2-chloro-3-iodopyridine (**4**) in 31 mL of toluene was added sequentially 10 mg (0.376 mmol) of Pd(OAc)<sub>2</sub>, 84 mg (0.376 mmol) of *rac*-BINAP, 1.37 g (62.5 mmol) of Cs<sub>2</sub>CO<sub>3</sub>, 31.3 mmol of the appropriate aniline, and 75.0 mg (0.752 mmol) of triethylamine. The resulting slurry was degassed (2X) by vacuum/N<sub>2</sub> backfills. The mixture was heated to

reflux and monitored by TLC (25% EtOAc/hexane) for the disappearance of starting materials. After 18 h the reaction mixture was cooled to rt and 30 mL of H<sub>2</sub>O was added. The layers were separated and the toluene layer was concentrated under reduced pressure. The residue could be used crude without further purification in the next step or purified by silica gel chromatography.

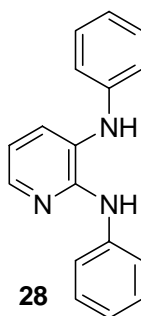

**Preparation of *N,N'*-Diphenylpyridine-2,3-diamine (28).** According to the general procedure for the preparation of symmetrically substituted diamines, reaction of 4.00 g (16.7 mmol) of **4** with 3.85 g (41.4 mmol) of aniline afforded 3.63 g (83%) of **28** as a colorless solid: mp 127-128 °C; <sup>1</sup>H NMR (CDCl<sub>3</sub>, 400 MHz) δ 5.18 (br s, 1H), 6.81 (m, 3H), 6.94 (m, 2H), 7.01 (t, 1H, *J* = 7.4 Hz), 7.32 (m, 4H), 7.42 (m, 1H), 7.56 (m, 2H), 8.13 (dd, 1H, *J* = 4.9 and 1.5 Hz); <sup>13</sup>C NMR (CDCl<sub>3</sub>, 100 MHz) δ 115.2, 116.0, 119.2, 120.5, 121.9, 125.2, 128.9, 129.4, 131.7, 140.6, 143.9, 144.8, 151.8; Anal. Calcd. For C<sub>17</sub>H<sub>15</sub>N<sub>3</sub>: C, 78.13; H, 5.79; N, 16.08. Found: C, 78.35; H, 5.46; N, 16.01.

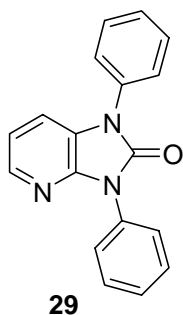

**Preparation of 1,3-Diphenyl-1,3-dihydro-2H-imidazo[4,5-*b*]pyridin-2-one (29).**

According to the general procedure for the preparation of imidazo[4,5-*b*]pyridin-2-ones, treatment of 1.50 g (5.74 mmol) of **28** with 681 mg (2.30 mmol) of triphosgene yielded 1.60 g (97%) of **29** as colorless solid: mp 119-120 °C;  $^1\text{H}$  NMR ( $\text{CDCl}_3$ , 400 MHz)  $\delta$  7.07 (dd, 1H,  $J = 7.8$  and 5.2 Hz), 7.38 (dd, 1H,  $J = 7.8$  and 1.5 Hz), 7.45 (m, 2H), 7.61 (m, 6H), 7.80 (m, 2H), 8.14 (dd, 1H,  $J = 5.2$  and 1.5 Hz);  $^{13}\text{C}$  NMR ( $\text{CDCl}_3$ , 100 MHz)  $\delta$  115.0, 118.0, 123.9, 125.8, 126.2, 127.8, 128.1, 129.3, 129.8, 133.3, 133.9, 141.7, 143.4, 151.8; Anal. Calcd. For  $\text{C}_{18}\text{H}_{13}\text{N}_3\text{O}$ : C, 75.25; H, 4.56; N, 14.63. Found: C, 75.17; H, 4.36; N, 14.50.

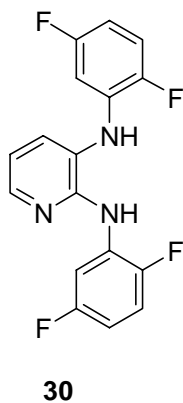

***N,N*-Bis(2,5-difluorophenyl)pyridine,2,3-diamine (30).** According to the general procedure for the preparation of symmetrically substituted diamines, reaction of 700 mg (2.92 mmol) of **4** with 940 mg (7.30 mmol) of 2,5-difluoroaniline gave 867 mg (89%) of

**30** which was used in the next step without further purification:  $^1\text{H}$  NMR ( $\text{CDCl}_3$ , 400 MHz)  $\delta$  5.42 (br s, 1H), 6.34 (m, 1H), 6.50 (m, 1H), 6.60 (m, 1H), 6.90 (dd, 1H,  $J = 7.6$  and 4.8 Hz), 7.00 (m, 1H), 7.06 (m, 1H), 7.37 (br s, 1H), 7.50 (dd, 1H,  $J = 7.6$  and 1.6 Hz), 8.24 (dd, 1H,  $J = 5.2$  and 1.6 Hz), 8.50 (m, 1H);  $^{13}\text{C}$  NMR ( $\text{CDCl}_3$ , 100 MHz,)  $\delta$  102.6 (dd,  $J = 28.7$  and 2.4 Hz), 105.9 (dd,  $J = 24.1$  and 7.2 Hz), 106.9 (dd,  $J = 24.9$  and 7.2 Hz), 107.0 (d,  $J = 30.5$  Hz), 114.7 (dd,  $J = 21.7$  and 9.6 Hz), 115.9 (dd,  $J = 20.9$  and 10.4 Hz), 116.2, 123.2, 129.8 (dd,  $J = 12.0$  and 11.2 Hz), 133.9, 134.5 (dd,  $J = 13.7$  and 11.2 Hz), 145.4, 148.2 (dd,  $J = 237.7$  and 3.2 Hz), 148.3 (dd,  $J = 236.9$  and 3.2 Hz), 151.5, 159.3 (dd,  $J = 239.1$  and 2.0 Hz), 159.5 (dd,  $J = 24.9$  and 1.6 Hz).

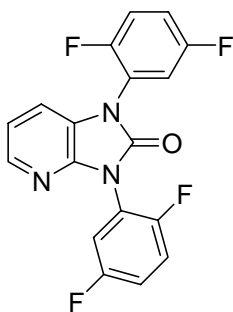

**33**

**1,3-Bis(2,5-difluorophenyl)-1,3-dihydro-2H-imidazo[4,5-*b*]pyridin-2-one (33).**

According to the general procedure for the preparation of imidazo[4,5-*b*]pyridin-2-ones, treatment of 970 mg (2.91 mmol) of **30** with 340 mg (1.14 mmol) of triphosgene gave 850 mg (81%) of **33** as an off-white solid: mp 130-132 °C;  $^1\text{H}$  NMR ( $\text{CDCl}_3$ , 400 MHz)  $\delta$  7.13 (dd, 1H,  $J = 8.0$  and 5.2 Hz), 7.21 (m, 3H), 7.34 (m, 4H), 8.15 (dd, 1H,  $J = 5.2$  and 1.2 Hz);  $^{13}\text{C}$  NMR ( $\text{CDCl}_3$ , 100 MHz,)  $\delta$  115.9 (d,  $J = 3.2$  Hz), 116.2 (d,  $J = 25.7$  Hz), 116.9 (d,  $J = 25.7$  Hz), 117.4 (dd,  $J = 24.1$  and 8.8 Hz), 117.5 (dd,  $J = 24.1$ , 8.8 Hz), 117.9 (dd,  $J = 22.5$  and 9.6 Hz), 118.1 (dd,  $J = 22.5$  and 8.8 Hz), 118.6, 120.9 (dd,  $J = 15.8$  and 12.0 Hz), 121.7 (dd,  $J = 14.5$  and 11.4 Hz), 123.7, 142.3, 142.9, 150.4, 153.8

(dd,  $J = 249.8$  and  $3.2$  Hz),  $154.4$  (dd,  $J = 249.8$  and  $3.2$  Hz),  $158.4$  (dd,  $J = 249.8$  and  $3.2$  Hz),  $158.6$  (dd,  $J = 249.0$  and  $3.2$  Hz);  $^{19}\text{F}$  NMR ( $\text{CDCl}_3$ ,  $376$  MHz)  $\delta$   $-123.9$  (d,  $J = 15.5$  Hz),  $-123.8$  (d,  $J = 17.2$  Hz),  $-117.1$  (d,  $J = 17.2$  Hz),  $-116.2$  (d,  $J = 15.5$  Hz); Anal. Calcd. For  $\text{C}_{18}\text{H}_9\text{F}_4\text{N}_3\text{O} \cdot 1/4 \text{H}_2\text{O}$ : C,  $59.43$ ; H,  $2.23$ ; N,  $11.50$ . Found: C,  $59.66$ ; H,  $2.25$ ; N,  $11.55$ .

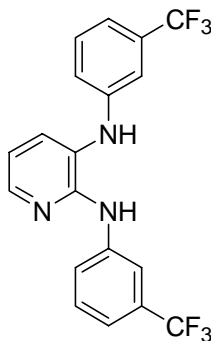

**31**

**Preparation of *N,N'*-Bis[3-(trifluoromethyl)phenyl]pyridine-2,3-diamine (31).**

According to the general procedure for the preparation of symmetrically substituted diamines, reaction of  $4.07$  g ( $17.0$  mmol) of **4** with  $6.85$  g ( $42.5$  mmol) of 3-(trifluoromethyl)aniline afforded  $5.98$  g ( $89\%$ ) of **31** as an oil:  $^1\text{H}$  NMR ( $\text{CDCl}_3$ ,  $400$  MHz)  $\delta$   $5.51$  (br s,  $1\text{H}$ ),  $6.86$  (m,  $2\text{H}$ ),  $7.03$  (d,  $2\text{H}$ ,  $J = 10.6$  Hz),  $7.17$  (d,  $1\text{H}$ ,  $J = 7.7$  Hz),  $7.23$  (d,  $1\text{H}$ ,  $J = 7.7$  Hz),  $7.35$  (q,  $2\text{H}$ ,  $J = 8.1$  Hz),  $7.43$  (d,  $1\text{H}$ ,  $J = 7.7$  Hz),  $7.69$  (d,  $1\text{H}$ ,  $J = 8.1$  Hz),  $7.89$  (s,  $1\text{H}$ ),  $8.17$  (m,  $1\text{H}$ );  $^{13}\text{C}$  NMR ( $\text{CDCl}_3$ ,  $100$  MHz,)  $\delta$   $112.3$  (d,  $J = 4.0$  Hz),  $115.6$  (d,  $J = 4.0$  Hz),  $116.3$ ,  $117.1$  (d,  $J = 4.0$  Hz),  $118.4$  (d,  $J = 4.0$  Hz),  $122.1$ ,  $124.1$  (q,  $J = 271.0$  Hz),  $124.2$ ,  $124.3$  (q,  $J = 271.0$  Hz),  $129.4$ ,  $130.2$ ,  $131.4$  (q,  $J = 31.0$  Hz),  $132.0$  (q,  $J = 31.0$  Hz),  $133.0$ ,  $140.9$ ,  $144.8$ ,  $145.4$ ,  $151.6$ ;  $^{19}\text{F}$  NMR ( $\text{CDCl}_3$ ,  $376$  MHz)  $\delta$   $-63.2$ ,  $-63.3$ .

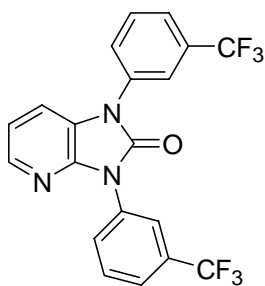

**34**

**Preparation of 1,3-Bis[3-(trifluoromethyl)phenyl]-1,3-dihydro-2H-imidazo[4,5-*b*]pyridin-2-one (34).** According to the general procedure for the preparation of imidazo[4,5-*b*]pyridin-2-ones, treatment of 1.50 g (3.79 mmol) of **31** with 450 mg (1.52 mmol) of triphosgene gave 1.53 g (95%) of **34** as a colorless solid: mp 181-182 °C;  $^1\text{H}$  NMR ( $\text{CDCl}_3$ , 400 MHz)  $\delta$  7.16 (dd, 1H,  $J = 7.8$  and 5.2 Hz), 7.42 (dd, 1H,  $J = 7.8$  and 1.4 Hz), 7.73 (m, 4H), 7.84 (m, 1H), 7.91 (s, 1H), 8.07 (m, 1H), 8.20 (m, 2H);  $^{13}\text{C}$  NMR ( $\text{CDCl}_3$ , 100 MHz,)  $\delta$  115.3, 118.7, 122.5 (d,  $J = 4.0$  Hz), 122.8 (d,  $J = 4.0$  Hz), 123.3, 123.5 (q,  $J = 271.0$  Hz), 123.7 (q,  $J = 271.0$  Hz), 124.4 (d,  $J = 4.0$  Hz), 125.0 (d,  $J = 4.0$  Hz), 128.9, 129.0, 130.5, 131.7 (q,  $J = 33.0$  Hz), 132.5 (q,  $J = 33.0$  Hz), 133.8, 134.3, 142.2, 142.9, 151.2;  $^{19}\text{F}$  NMR ( $\text{CDCl}_3$ , 376 MHz)  $\delta$  -63.14, -63.26; Anal. Calcd. For  $\text{C}_{20}\text{H}_{11}\text{F}_6\text{N}_3\text{O}$ : C, 56.75; H, 2.62; N, 9.93. Found: C, 56.47; H, 2.41; N, 9.82.

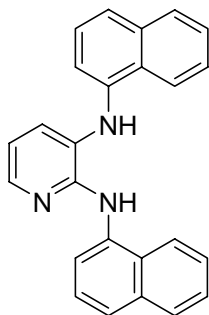

**32**

**Preparation of *N,N*-Di-1-naphthylpyridine-2,3-diamine (32).** According to the general procedure for the preparation of symmetrically substituted diamines, reaction of



2.00 g (8.35 mmol) of **4** with 2.99 g (20.9 mmol) of 1-aminonaphthalene gave 2.41 g (80%) of **32** which was used in the next step without further purification:  $^1\text{H}$  NMR ( $\text{CDCl}_3$ , 400 MHz)  $\delta$  5.98 (br s, 1H), 6.81 (dd, 1H,  $J = 7.6$  and 4.8 Hz), 6.90 (d, 1H,  $J = 7.2$  Hz), 7.22 – 7.60 (m, 10 H), 7.64 (d, 1H,  $J = 8.0$  Hz), 7.83 (d, 1H,  $J = 8.0$  Hz), 7.93 (d, 1H,  $J = 8.0$  Hz), 7.97 (d, 1H,  $J = 7.6$  Hz), 8.03 (dd, 1H,  $J = 7.6$  and 1.2 Hz), 8.12 (dd, 1H,  $J = 4.8$  and 1.6 Hz)  $^{13}\text{C}$  NMR ( $\text{CDCl}_3$ , 100 MHz)  $\delta$  112.8, 116.0, 116.8, 121.1, 122.2, 123.2, 125.6, 125.7, 125.8, 126.0, 126.2, 126.3, 126.95, 127.04, 128.3, 128.6, 128.8, 129.1, 130.5, 134.4, 134.7, 135.9, 139.4, 143.1, 150.7.

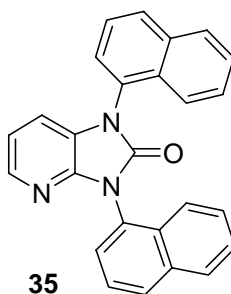

**1,3-Di-(1-naphthyl)-1,3-dihydro-2H-imidazo[4,5-*b*]pyridin-2-one (35).** According to the general procedure for the preparation of imidazo[4,5-*b*]pyridin-2-ones, treatment of 1.92 g (5.31 mmol) of **32** with 630 mg (2.1 mmol) of triphosgene gave 1.73 g (84%) of **35** as a light purple solid. mp: 231-232 °C;  $^1\text{H}$  NMR ( $\text{CDCl}_3$ , 400 MHz)  $\delta$  7.00 (m, 2H), 7.52-7.82 (m, 10H), 8.03 (m, 5H);  $^{13}\text{C}$  NMR ( $\text{DMSO}-d_6$ , 100 MHz)  $\delta$  115.0 and 115.1 (due to rotomers), 118.2 and 118.1 (due to rotomers), 122.5, 122.91 and 122.93 (due to rotomers), 123.2, 125.4 and 125.5 (due to rotomers), 125.74 and 125.76 (due to rotomers), 125.97 and 126.01 (due to rotomers), 126.55 and 126.59 (due to rotomers), 126.81 and 126.83 (due to rotomers), 127.02 and 127.07 (due to rotomers), 127.2 and 127.25 (due to rotomers), 127.33, 127.55 and 127.60 (due to rotomers), 127.88, 128.3 and 128.4 (due to rotomers), 128.5 and 128.6 (due to rotomers), 129.44 and 129.46 (due

to rotomers), 129.65 and 129.70 (due to rotomers), 129.74 and 129.77 (due to rotomers), 130.27 and 130.28 (due to rotomers), 133.99 and 134.00 (due to rotomers), 134.2, 140.8 and 140.9 (due to rotomers), 144.3 and 144.4 (due to rotomers), 152.1 and 152.2 (due to rotomers); Anal. Calcd for C<sub>26</sub>H<sub>17</sub>N<sub>3</sub>O: C, 80.60; H, 4.42; N, 10.85. Found: C, 80.27; H, 4.28; N, 10.77.

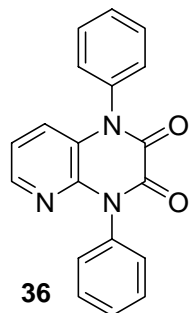

**Preparation of 1,4-Diphenyl-1,4-dihydropyrido[2,3-*b*]pyrazine-2,3-diamine (36).** To a stirred solution of 350 mg (1.34 mmol) of **28** in 8 mL of THF was added 312 mg (3.09 mmol) of triethylamine followed by 189 mg (1.49 mmol) of oxalyl chloride. After stirring for 15 min at rt, the reaction was diluted with EtOAc and then quenched with 8 mL of sat. aqueous NaHCO<sub>3</sub>. The organic layer was dried over MgSO<sub>4</sub> and the solvent removed under reduced pressure. The residual solid was recrystallized from EtOAc/hexane to give 400 mg (95%) of **36** as a tan solid: mp 300 °C (decomp); <sup>1</sup>H NMR (CDCl<sub>3</sub>, 400 MHz) δ 6.76 (dd, 1H, *J* = 8.1 and 1.3 Hz), 7.05 (dd, 1H, *J* = 8.1 and 4.6 Hz), 7.35 (d, 2H, *J* = 7.4 Hz), 7.45 (m, 3H), 7.55 (m, 3H), 7.66 (m, 2H), 7.95 (dd, 1H, *J* = 4.6 and 1.3 Hz); <sup>13</sup>C NMR (CDCl<sub>3</sub>, 100 MHz) δ 119.6, 123.4, 125.9, 128.8, 128.9, 129.3, 129.7, 129.9, 130.9, 136.3, 136.9, 140.8, 142.0, 154.5, 155.7; Anal. Calcd. For C<sub>19</sub>H<sub>13</sub>N<sub>3</sub>O<sub>2</sub>: C, 72.37; H, 4.16; N, 13.33. Found: C, 72.61; H, 4.08; N, 13.13.

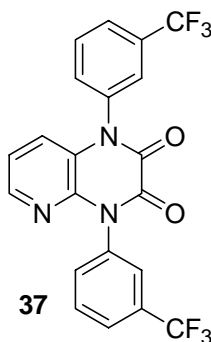

**Preparation of 1,4-Bis[3-(Trifluoromethyl)phenyl]-1,4-dihydropyrido[2,3-*b*]pyrazine-2,3-dione (37).** To a stirred solution of 1.15 mg (2.91 mmol) of **31** in 25 mL of THF was added 675 mg (6.67 mmol) of triethylamine followed by 407 mg (3.21 mmol) of oxalyl chloride. After stirring for 15 min at rt, the reaction was diluted with EtOAc and then quenched with 25 mL of sat. aqueous NaHCO<sub>3</sub>. The organic layer was dried over MgSO<sub>4</sub> and the solvent removed under reduced pressure. The residual solid was recrystallized from EtOAc/hexane to give 1.27 g (97%) of **37** as a yellow solid: mp 319-320 °C; <sup>1</sup>H NMR (DMSO-*d*<sub>6</sub>, 400 MHz) δ 6.87 (dd, 1H, *J* = 8.2 and 1.3 Hz), 7.12 (dd, 1H, *J* = 8.2 and 4.7 Hz), 7.71 (m, 1H), 7.76 (m, 2H), 7.86 (m, 3H), 7.92 (m, 1H), 8.01 (m, 2H); <sup>13</sup>C NMR (DMSO-*d*<sub>6</sub>, 100 MHz) δ 119.9, 123.6, 124.1 (q, *J* = 272.0 Hz), 124.3 (q, *J* = 272.0 Hz), 125.8, 125.9, 126.1, 126.9, 130.6 (q, *J* = 30.0 Hz), 131.2, 131.8 (q, *J* = 30.0 Hz), 133.5, 133.8, 136.9, 137.5, 140.6, 142.2, 154.5, 155.4; <sup>19</sup>F NMR (DMSO-*d*<sub>6</sub>, 376 MHz) -61.6, -61.8; Anal. Calcd. For C<sub>21</sub>H<sub>11</sub>F<sub>6</sub>N<sub>3</sub>O<sub>2</sub>: C, 55.89; H, 2.46; N, 9.31. Found: C, 55.64; H, 2.24; N, 9.26.

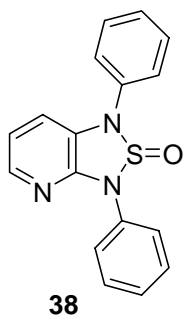

**Preparation of 1,3-Diphenyl-1,3-dihydro[1,2,5]thiadiazolo[3,4-*b*]pyridine-2-oxide**

**(38).** To a stirred solution of 371 mg (1.42 mmol) of **28** in 8 mL of THF was added 334 mg (3.30 mmol) of triethylamine followed by 179 mg (1.51 mmol) of thionyl chloride. After stirring at rt for 15 min the reaction was diluted with EtOAc and then quenched with 10 mL of sat. aqueous NaHCO<sub>3</sub>. The organic layer was dried over MgSO<sub>4</sub> and the solvent removed under reduced pressure. The residual was purified by silica gel chromatography to give 388 mg (89%) of **38** as an oil: <sup>1</sup>H NMR (CDCl<sub>3</sub>, 400 MHz) δ 6.91 (dd, 1H, *J* = 7.8 and 5.1 Hz), 7.13 (dd, 1H, *J* = 7.8 and 1.3 Hz), 7.45 (m, 2H), 7.56 (m, 6H), 7.69 (m, 2H), 7.98 (dd, 1H, *J* = 5.1 and 1.3 Hz); <sup>13</sup>C NMR (CDCl<sub>3</sub>, 100 MHz) δ 116.6, 116.7, 126.8, 126.9, 127.6, 128.4, 128.6, 129.9, 130.3, 134.5, 135.7, 140.5, 146.8; Anal. Calcd. For C<sub>17</sub>H<sub>13</sub>N<sub>3</sub>OS: C, 66.43; H, 4.26; N, 13.67. Found: C, 66.40; H, 4.12; N, 13.49.

**References**

1. Sakamoto, T.; Kondo, Y.; Yamanaka, H. *Chem. Pharm. Bull.* **1985**, 33, 4764.
2. Robinson, M. M.; Finch, N. U. S. Patent 3719683 (1973).

Current Data Parameters  
NAME 67244-0900  
EXPNO 2  
PROCNO 1

F2 - Acquisition Parameters

Date\_ 20040213  
Time 15:35  
INSTRUM spect  
PROBHD 5 mm QNP 1H  
PULPROG zgdc  
TD 65536  
SOLVENT CDCl3  
NS 64  
DS 4  
SWH 26315.789 Hz  
FIDRES 0.401547 Hz  
AQ 1.2452340 sec  
RG 8196  
DM 19.000 usec  
DE 6.00 usec  
TE 300.0 K  
D1 0.10000000 sec  
d11 0.03000000 sec

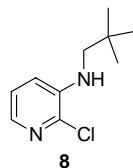

----- CHANNEL f1 -----  
NUC1 13C  
P1 3.00 usec  
PL1 5.00 dB  
SF01 100.5584112 MHz

----- CHANNEL f2 -----  
CPOPRG2 waltz16  
NUC2 1H  
PCPD2 100.00 usec  
PL2 120.00 dB  
PL12 14.70 dB  
SF02 399.8719994 MHz

F2 - Processing parameters  
SI 32768  
SF 100.5473900 MHz  
WDW no  
SSB 0  
LB 0.00 Hz  
SB 0  
PC 1.40

1D NMR plot parameters  
CX 23.50 cm  
CY 15.00 cm  
F1P 240.000 ppm  
F1 24131.36 Hz  
F2P -10.000 ppm  
F2 -1005.47 Hz  
PPMCM 10.63830 ppm/cm  
HZCM 1069.65320 Hz/cm

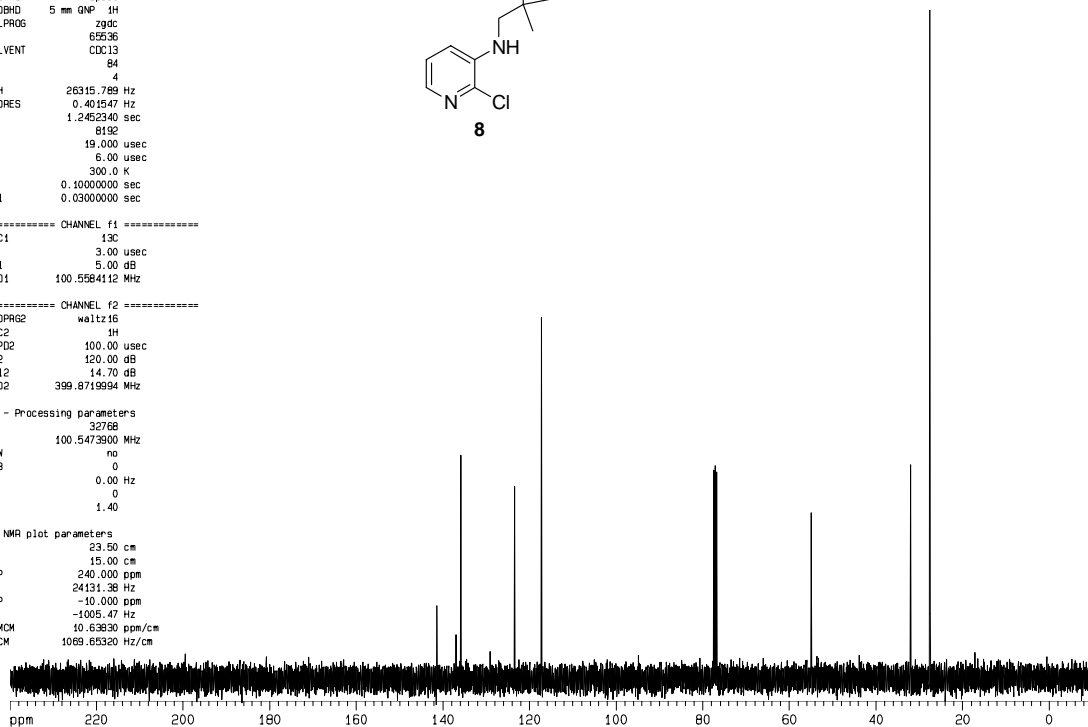

Current Data Parameters  
NAME 67244-1574  
EXPNO 1  
PROCNO 1

F2 - Acquisition Parameters

Date\_ 20040223  
Time 13:43  
INSTRUM spect  
PROBHD 5 mm QNP 1H  
PULPROG zg30  
TD 32768  
SOLVENT CDCl3  
NS 8  
DS 2  
SWH 6578.947 Hz  
FIDRES 0.200774 Hz  
AQ 2.4804180 sec  
RG 406.4  
DM 76.000 usec  
DE 6.00 usec  
TE 300.0 K  
D1 0.10000000 sec

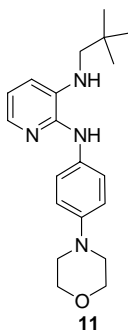

----- CHANNEL f1 -----  
NUC1 1H  
P1 10.50 usec  
PL1 6.00 dB  
SF01 399.8724592 MHz

F2 - Processing parameters  
SI 16384  
SF 399.8700207 MHz  
WDW no  
SSB 0  
LB 0.00 Hz  
SB 0  
PC 1.00

1D NMR plot parameters  
CX 23.50 cm  
CY 35.00 cm  
F1P 9.750 ppm  
F1 3898.73 Hz  
F2P -0.250 ppm  
F2 -99.97 Hz  
PPMCM 0.42553 ppm/cm  
HZCM 170.15744 Hz/cm

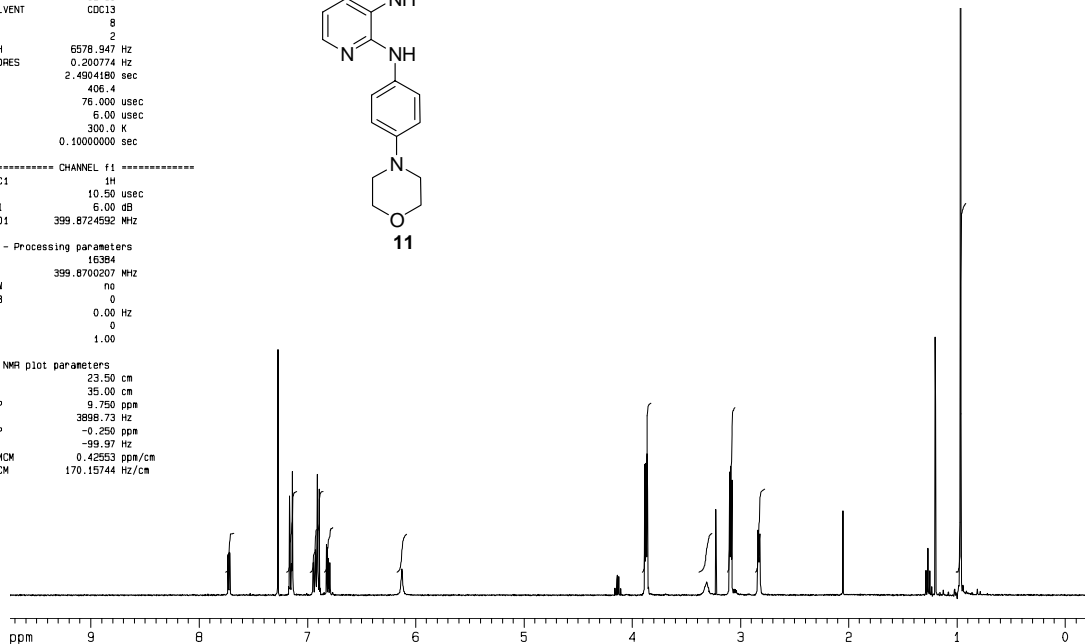

Current Data Parameters  
 NAME 67244-092a  
 EXPNO 1  
 PROCNO 1

F2 - Acquisition Parameters  
 Date\_ 20031219  
 Time 9.33  
 INSTRUM spect  
 PROBRD 5 mm QNP 1H  
 PULPROG zg30  
 TD 32768  
 SOLVENT CDCl3  
 NS 8  
 DS 2  
 SWH 6578.947 Hz  
 FIDRES 0.200774 Hz  
 AQ 2.4904180 sec  
 RG 362  
 DW 76.000 usec  
 DE 6.00 usec  
 TE 300.0 K  
 D1 0.10000000 sec

===== CHANNEL f1 =====  
 NUC1 1H  
 P1 10.50 usec  
 PL1 6.00 dB  
 SFO1 399.8724592 MHz

F2 - Processing parameters  
 SI 16384  
 SF 399.8700207 MHz  
 WDW no  
 SSB 0  
 LB 0.00 Hz  
 GB 0  
 PC 1.00

1D NMR plot parameters  
 CX 23.50 cm  
 CY 80.00 cm  
 F1 9.760 ppm  
 F1 3898.73 Hz  
 F2 -0.250 ppm  
 F2 -99.97 Hz  
 PPMON 0.42553 ppm/cm  
 HZCM 170.15744 Hz/cm

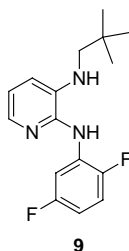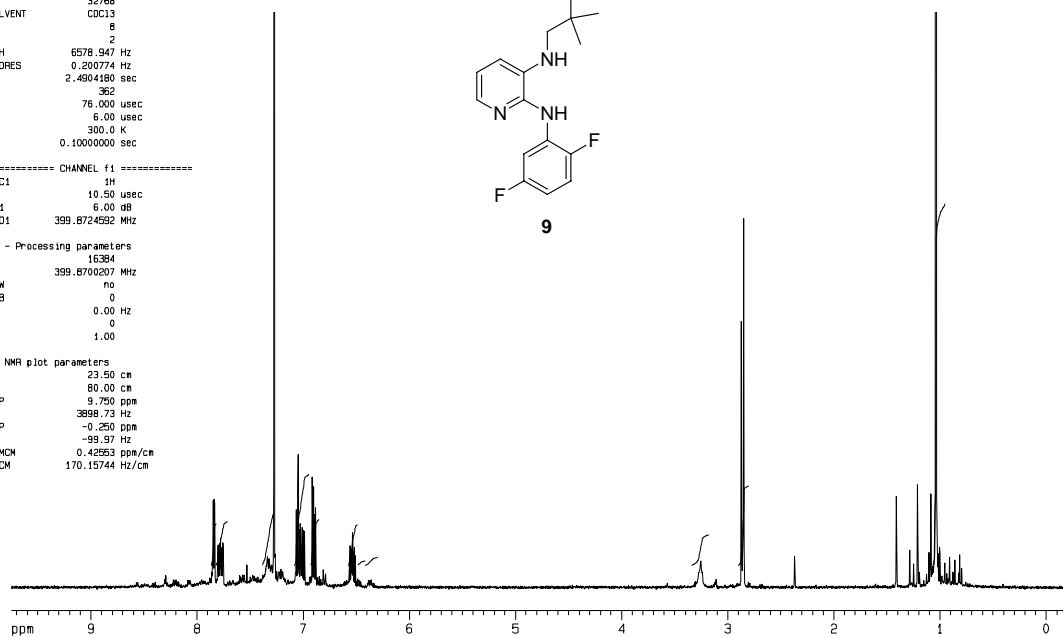

Current Data Parameters  
NAME 67244-094c  
EXPNO 1  
PROCNO 1

F2 - Acquisition Parameters  
Date\_ 20031223  
Time 8.58  
INSTRUM spect  
PROBHD 5 mm QNP 1H  
PULPROG zg30  
TD 32768  
SOLVENT CDCl3  
NS 8  
DS 2  
SWH 6578.947 Hz  
FIDRES 0.200774 Hz  
AQ 2.4904180 sec  
RG 256  
DW 76.000 usec  
DE 6.00 usec  
TE 300.0 K  
D1 0.1000000 sec

----- CHANNEL f1 -----  
NUC1 1H  
P1 10.50 usec  
PL1 6.00 dB  
SFO1 399.8724592 MHz

F2 - Processing parameters  
SI 16384  
SF 399.8700207 MHz  
WDW no  
SSB 0  
LB 0.00 Hz  
SB 0  
PC 1.00

1D NMR plot parameters  
CX 23.50 cm  
CY 15.00 cm  
F1P 9.750 ppm  
F1 3898.73 Hz  
F2P -0.250 ppm  
F2 -99.97 Hz  
PPMCM 0.42553 ppm/cm  
HZCM 170.15744 Hz/cm

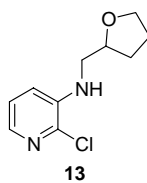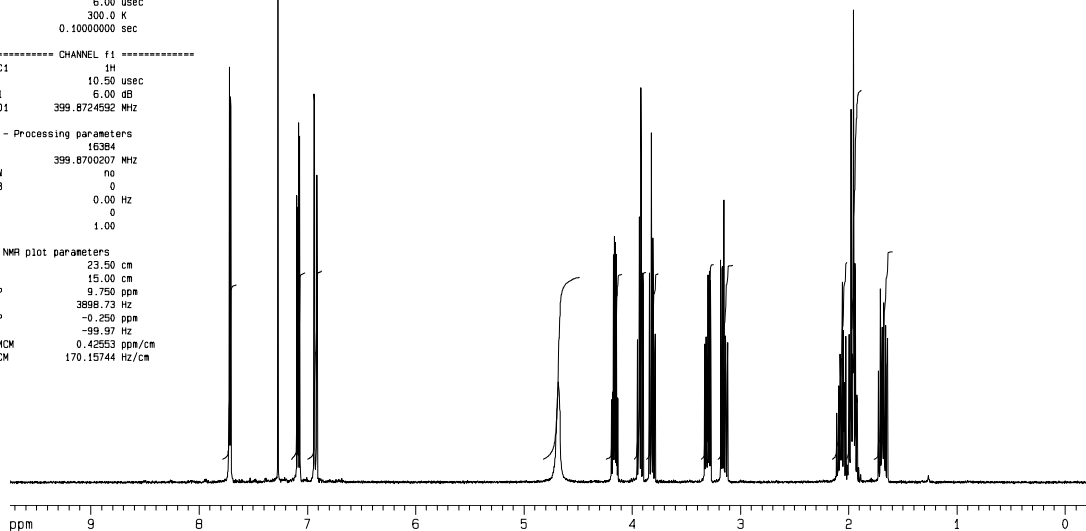

Current Data Parameters  
NAME 67244-155c  
EXPNO 1  
PROCNO 1

F2 - Acquisition Parameters  
Date\_ 20040217  
Time 14.44  
INSTRUM spect  
PROBHD 5 mm QNP 1H  
PULPROG zg30  
TD 32768  
SOLVENT CDCl3  
NS 8  
DS 2  
SWH 6578.947 Hz  
FIDRES 0.200774 Hz  
AQ 2.4904180 sec  
RG 143.7  
DW 76.000 usec  
DE 6.00 usec  
TE 300.0 K  
D1 0.1000000 sec

----- CHANNEL f1 -----  
NUC1 1H  
P1 10.50 usec  
PL1 6.00 dB  
SFO1 399.8724592 MHz

F2 - Processing parameters  
SI 16384  
SF 399.8700207 MHz  
WDW no  
SSB 0  
LB 0.00 Hz  
SB 0  
PC 1.00

1D NMR plot parameters  
CX 23.50 cm  
CY 15.00 cm  
F1P 9.750 ppm  
F1 3898.73 Hz  
F2P -0.250 ppm  
F2 -99.97 Hz  
PPMCM 0.42553 ppm/cm  
HZCM 170.15744 Hz/cm

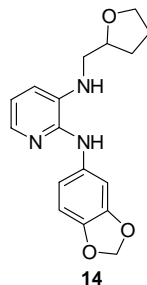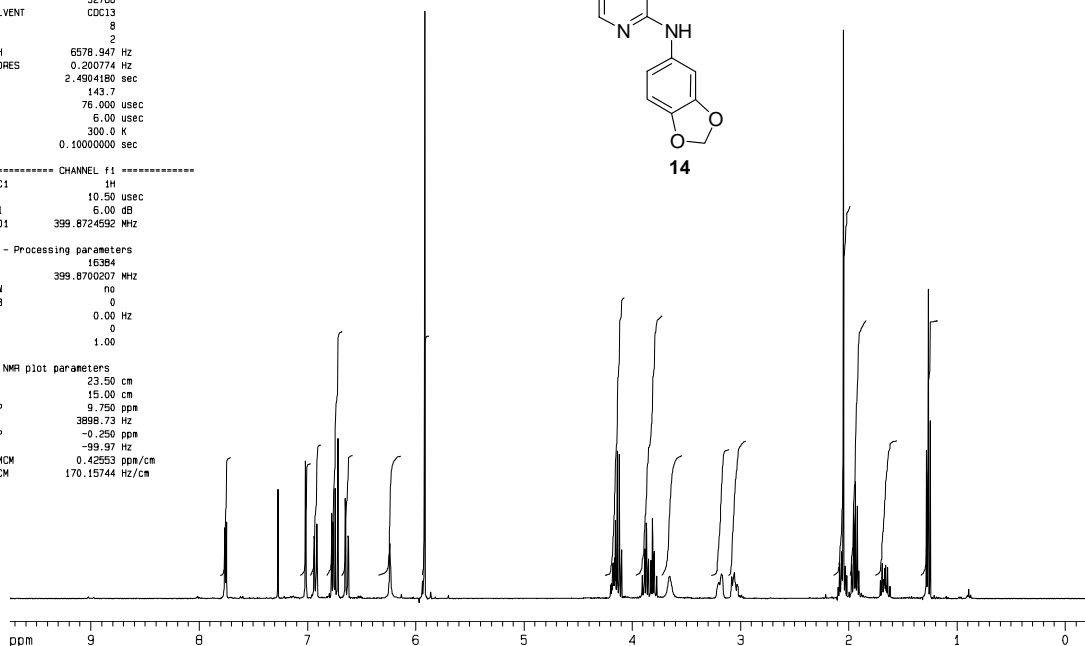

Current Data Parameters  
NAME 67244-107c  
EXPNO 2  
PROCNO 1

F2 - Acquisition Parameters  
Date\_ 20040109  
Time 11:27  
INSTRUM spect  
PROBHD 5 mm QNP 1H  
PULPROG zgdc  
TD 65536  
SOLVENT CDC13  
NS 237  
DS 4  
SWH 26315.789 Hz  
FIDRES 0.401547 Hz  
AQ 1.2452340 sec  
RG 7298.2  
DM 19.000 usec  
DE 6.00 usec  
TE 300.0 K  
D1 0.10000000 sec  
d11 0.03000000 sec

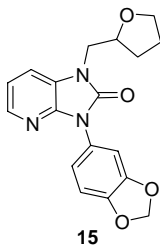

===== CHANNEL f1 =====  
NUC1 13C  
P1 3.00 usec  
PL1 5.00 dB  
SF01 100.5584112 MHz

===== CHANNEL f2 =====  
CPDPRG2 waltz16  
NUC2 1H  
PCPD2 100.00 usec  
PL2 120.00 dB  
PL12 14.70 dB  
SF02 399.8719994 MHz

F2 - Processing parameters  
SI 32768  
SF 100.5473900 MHz  
WDW EM  
SSB 0  
LB 1.00 Hz  
GB 0  
PC 1.40

1D NMR plot parameters  
CX 23.50 cm  
CY 10.00 cm  
F1P 240.000 ppm  
F1 24131.38 Hz  
F2P -10.000 ppm  
F2 -1005.47 Hz  
PPMCM 10.63830 ppm/cm  
HZCM 1069.65320 Hz/cm

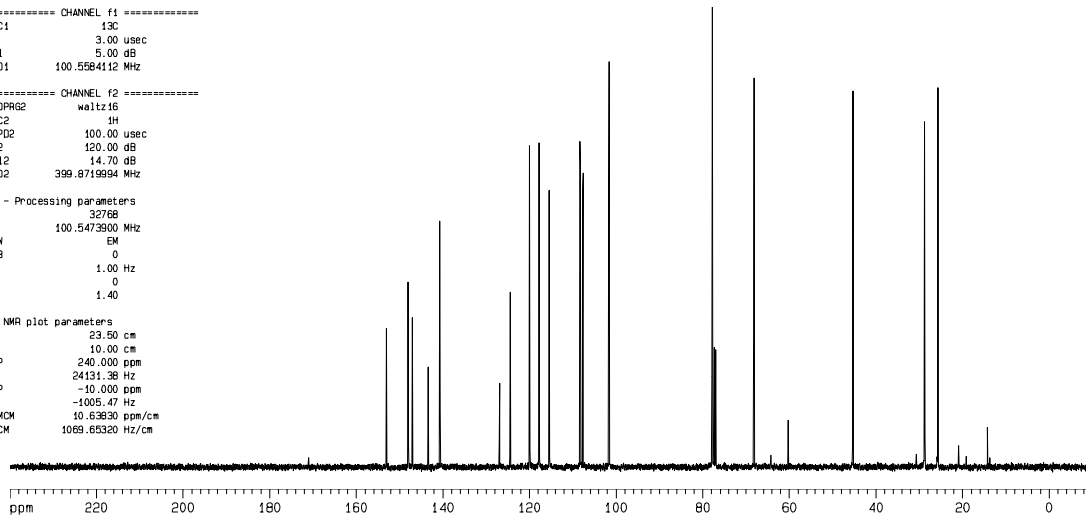

Current Data Parameters  
NAME 67244-153d  
EXPNO 2  
PROCNO 1

F2 - Acquisition Parameters  
Date\_ 20040218  
Time 11:38  
INSTRUM spect  
PROBHD 5 mm QNP 1H  
PULPROG zgdc  
TD 65536  
SOLVENT CDC13  
NS 204  
DS 4  
SWH 26315.789 Hz  
FIDRES 0.401547 Hz  
AQ 1.2452340 sec  
RG 2048  
DM 19.000 usec  
DE 6.00 usec  
TE 300.0 K  
D1 0.10000000 sec  
d11 0.03000000 sec

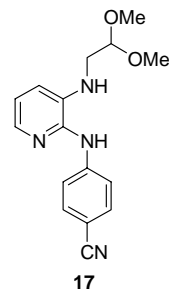

===== CHANNEL f1 =====  
NUC1 13C  
P1 3.00 usec  
PL1 5.00 dB  
SF01 100.5584112 MHz

===== CHANNEL f2 =====  
CPDPRG2 waltz16  
NUC2 1H  
PCPD2 100.00 usec  
PL2 120.00 dB  
PL12 14.70 dB  
SF02 399.8719994 MHz

F2 - Processing parameters  
SI 32768  
SF 100.5473900 MHz  
WDW EM  
SSB 0  
LB 1.00 Hz  
GB 0  
PC 1.40

1D NMR plot parameters  
CX 23.50 cm  
CY 10.00 cm  
F1P 240.000 ppm  
F1 24131.38 Hz  
F2P -10.000 ppm  
F2 -1005.47 Hz  
PPMCM 10.63830 ppm/cm  
HZCM 1069.65320 Hz/cm

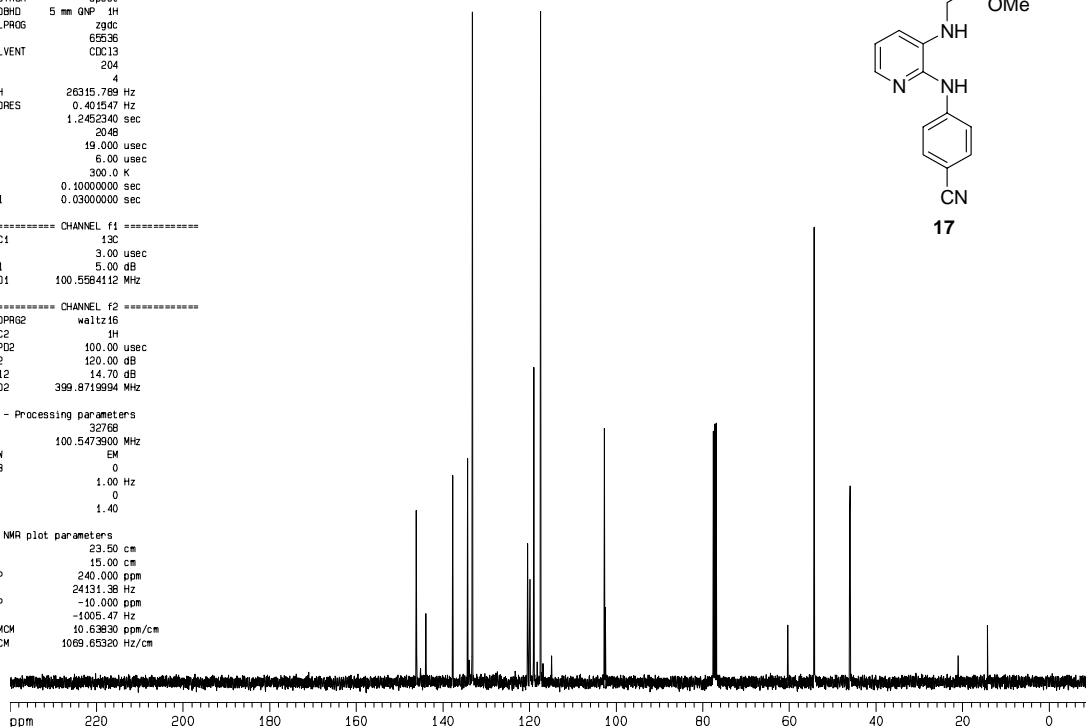



Current Data Parameters  
 NAME 179291-060  
 EXPNO 1  
 PROCNO 1

F2 - Acquisition Parameters  
 Date\_ 20031216  
 Time 13.04  
 INSTRUM spect  
 PROBHD 5 mm QNP 1H  
 PULPROG zg30  
 TO 32768  
 SOLVENT CDCl3  
 NS 8  
 DS 4  
 SWH 6578.947 Hz  
 FIDRES 0.200774 Hz  
 AQ 2.4904180 sec  
 RG 90.5  
 DM 76.000 usec  
 DE 6.00 usec  
 TE 300.0 K  
 D1 0.10000000 sec

===== CHANNEL f1 =====  
 NUC1 1H  
 P1 10.50 usec  
 PL1 -3.00 dB  
 SFO1 400.2522014 MHz

F2 - Processing parameters  
 SI 16384  
 SF 400.2500593 MHz  
 WDW no  
 SSB 0  
 LB 0.00 Hz  
 GB 0  
 PC 1.00

1D NMR plot parameters  
 CX 23.50 cm  
 CY 20.00 cm  
 F1P 9.750 ppm  
 F1 3902.44 Hz  
 F2P -0.250 ppm  
 F2 -100.06 Hz  
 PPMCM 0.42553 ppm/cm  
 HZCM 170.31917 Hz/cm

nmr400a h-1

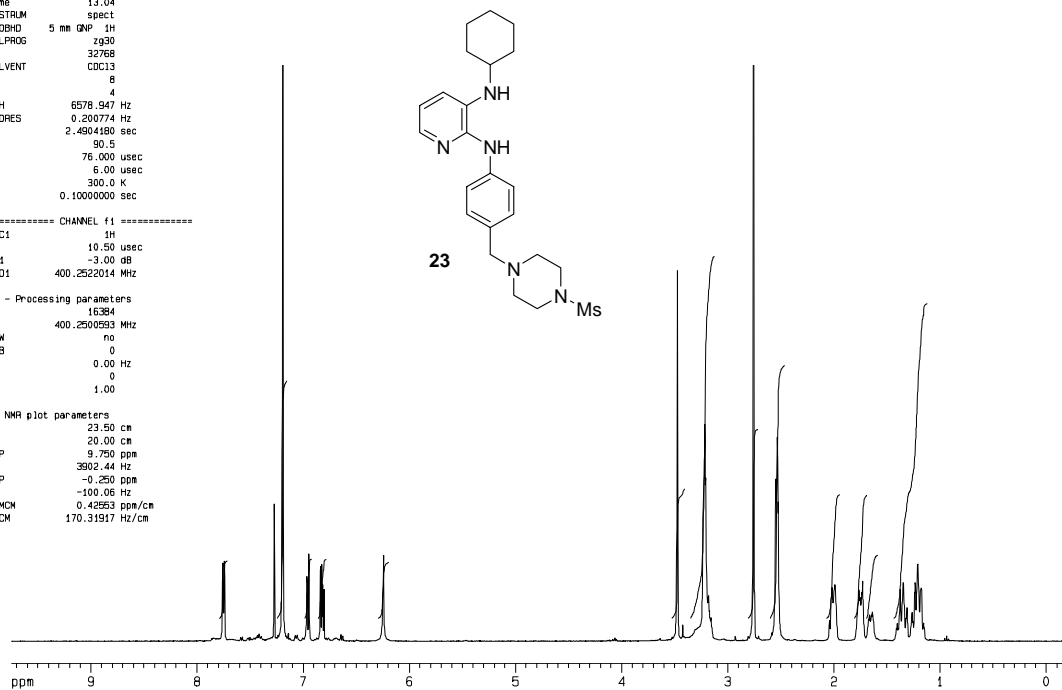

Current Data Parameters  
NAME 179291-042  
EXPNO 1  
PROCNO 1

nmr400a h-1

F2 - Acquisition Parameters  
Date\_ 20031208  
Time 10.43  
INSTRUM spect  
PROBHD 5 mm QNP 1H  
PULPROG zg30  
TD 32768  
SOLVENT CDCl3  
NS 8  
DS 4  
SWH 6578.947 Hz  
FIDRES 0.200774 Hz  
AQ 2.4904180 sec  
RG 101.6  
DM 76.000 usec  
DE 6.00 usec  
TE 300.0 K  
D1 0.10000000 sec

===== CHANNEL f1 =====  
NUC1 1H  
P1 10.50 usec  
PL1 -3.00 dB  
SFO1 400.252014 MHz

F2 - Processing parameters  
SI 16384  
SF 400.2500593 MHz  
WDW no  
SSB 0  
LB 0.00 Hz  
GB 0  
PC 1.00

1D NMR plot parameters  
CX 23.50 cm  
CY 15.00 cm  
F1P 9.750 ppm  
F1 3902.44 Hz  
F2P -0.250 ppm  
F2 -100.06 Hz  
PPHOM 0.42553 ppm/cm  
HZCM 170.31917 Hz/cm

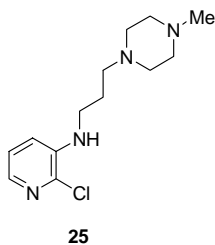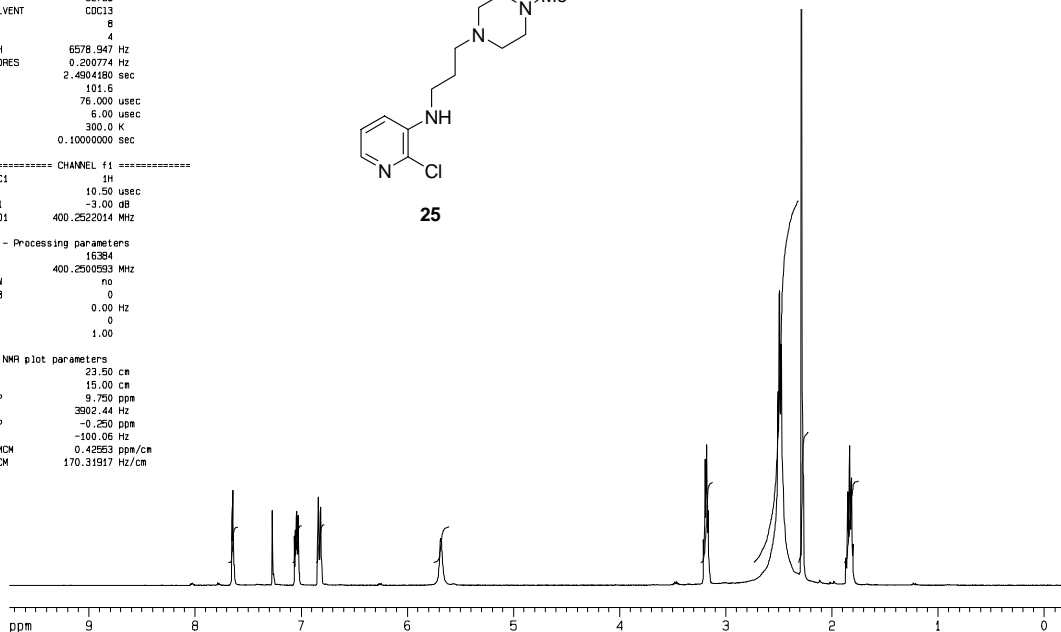

Current Data Parameters  
NAME 179291-120aa  
EXPNO 1  
PROCNO 1

nmr400b h-1

F2 - Acquisition Parameters  
Date\_ 20040123  
Time 8.14  
INSTRUM spect  
PROBHD 5 mm QNP 1H  
PULPROG zg30  
TD 32768  
SOLVENT CDCl3  
NS 8  
DS 2  
SWH 6578.947 Hz  
FIDRES 0.200774 Hz  
AQ 2.4904180 sec  
RG 71.8  
DM 76.000 usec  
DE 6.00 usec  
TE 300.0 K  
D1 0.10000000 sec

===== CHANNEL f1 =====  
NUC1 1H  
P1 10.50 usec  
PL1 6.00 dB  
SFO1 399.8724592 MHz

F2 - Processing parameters  
SI 16384  
SF 399.870207 MHz  
WDW no  
SSB 0  
LB 0.00 Hz  
GB 0  
PC 1.00

1D NMR plot parameters  
CX 23.50 cm  
CY 15.00 cm  
F1P 9.750 ppm  
F1 3898.73 Hz  
F2P -0.250 ppm  
F2 -99.97 Hz  
PPHOM 0.42553 ppm/cm  
HZCM 170.15744 Hz/cm

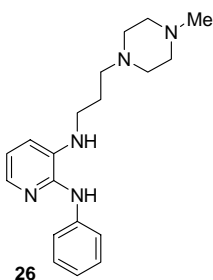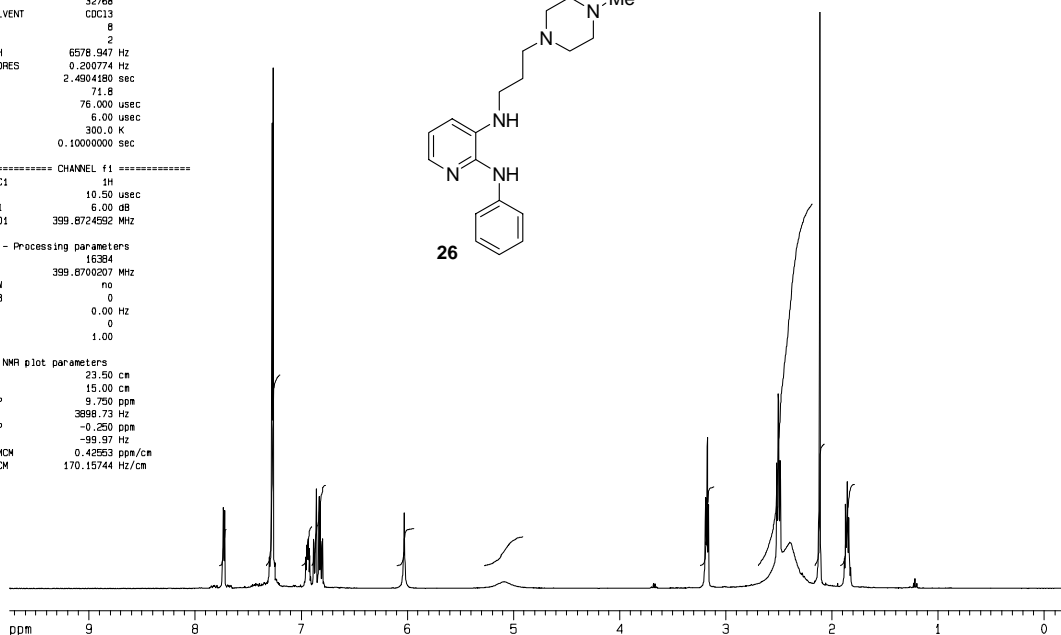

Current Data Parameters  
 NAME 67244-1546  
 EXPNO 2  
 PROCNO 1

F2 - Acquisition Parameters  
 Date\_ 20040213  
 Time 18.03  
 INSTRUM spect  
 PROBHD 5 mm QNP 4H  
 PULPROG zgpg30  
 TD 65536  
 SOLVENT CDCl3  
 NS 168  
 DS 0  
 SWH 26315.789 Hz  
 FIDRES 0.401547 Hz  
 AQ 1.2452340 sec  
 RG 9195.2  
 DW 19.000 usec  
 DE 6.00 usec  
 TE 300.0 K  
 D1 0.10000000 sec  
 d11 0.03000000 sec

===== CHANNEL f1 =====  
 NUC1 13C  
 P1 2.00 usec  
 PL1 0.00 dB  
 SFO1 100.626125 MHz

===== CHANNEL f2 =====  
 CPDPRG2 waltz16  
 NUC2 1H  
 P2 93.00 usec  
 PL2 120.00 dB  
 PL12 18.00 dB  
 SFO2 400.2520012 MHz

F2 - Processing parameters  
 SI 32768  
 SF 100.626125 MHz  
 WDW EM  
 SSB 0  
 LB 1.00 Hz  
 SB 0  
 PC 1.40

1D NMR plot parameters  
 CX 23.50 cm  
 CY 15.00 cm  
 F1P 240.000 ppm  
 F1 24154.31 Hz  
 F2P -1006.43 Hz  
 F2 -1006.43 Hz  
 PPMCM 10.63830 ppm/cm  
 HZCM 1070.66980 Hz/cm

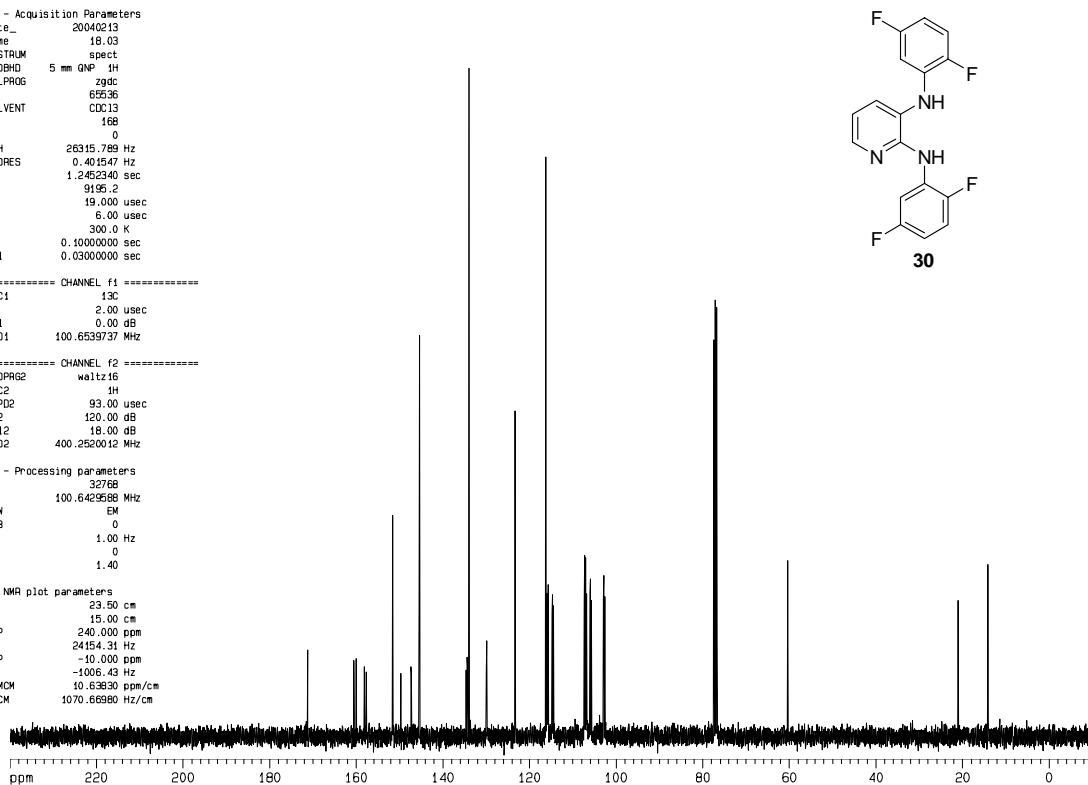

Current Data Parameters  
 NAME 173291-109aa  
 EXPNO 2  
 PROCNO 1

F2 - Acquisition Parameters  
 Date\_ 20040210  
 Time 14.42  
 INSTRUM spect  
 PROBHD 5 mm QNP 1H  
 PULPROG zgpg  
 TO 699.36  
 SFO1 100.625  
 NS 322  
 DS 4  
 SWH 26315.789 Hz  
 FIDRES 0.401547 Hz  
 AQ 1.2452340 sec  
 RG 6130  
 DW 19.000 usec  
 DE 6.00 usec  
 TE 300.0 K  
 D1 0.10000000 sec  
 sfl 0.03000000 sec

----- CHANNEL f1 -----  
 NUC1 13C  
 P1 3.00 usec  
 PL1 5.00 dB  
 SFO1 100.5584112 MHz  
 ----- CHANNEL f2 -----  
 CPDPRG2 waltz16  
 NUC2 1H  
 P2 100.00 usec  
 PL2 120.00 dB  
 PL12 14.70 dB  
 SFO2 399.8719894 MHz

F2 - Processing parameters  
 S1 32768  
 SF 100.5473900 MHz  
 WDW EM  
 SSB 0  
 LB 1.00 Hz  
 SB 0  
 PC 1.40

1D NMR plot parameters  
 CX 23.50 cm  
 CY 10.00 cm  
 FID 200.000 ppm  
 F1 20109.48 Hz  
 F2 -0.000 ppm  
 F2 -0.000 Hz  
 PPMCM 8.51064 ppm/cm  
 HZCM 855.72247 Hz/cm

nmr400b h-1 decoupled c-13

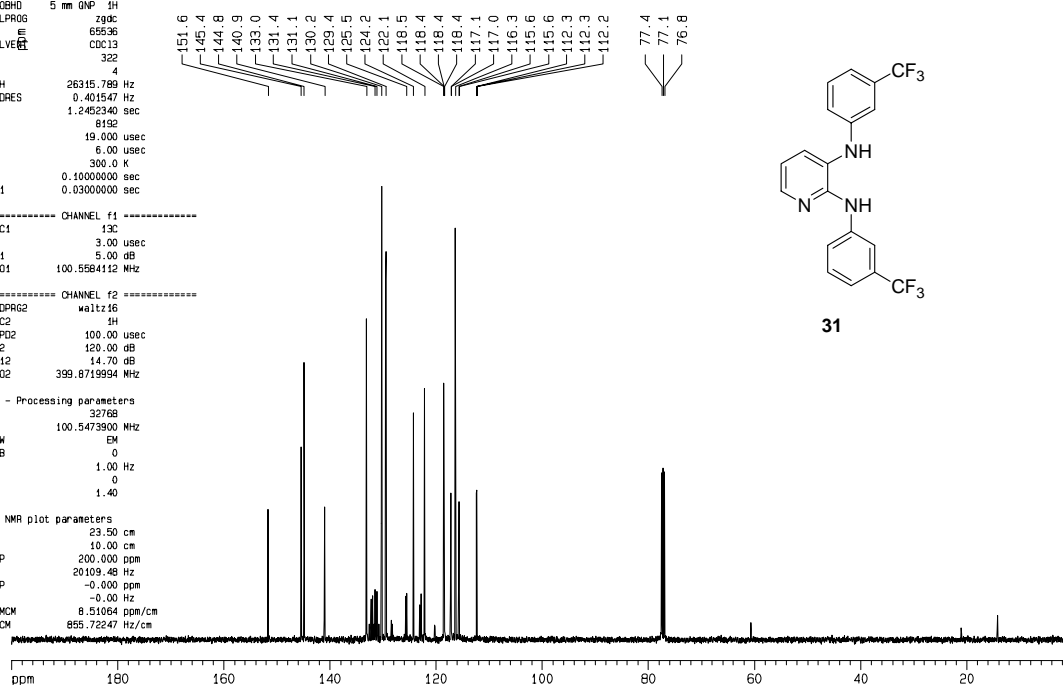

Current Data Parameters  
NAME 67244-112a  
EXPNO 2  
PROCNO 1

F2 - Acquisition Parameters

Date\_ 20040121  
Time 11:33  
INSTRUM spect  
PROBHD 5 mm QNP 1H  
PULPROG zgdc  
TD 65536  
SOLVENT CDCl3  
NS 557  
DS 0  
SWH 26315.789 Hz  
FIDRES 0.401547 Hz  
AQ 1.2452340 sec  
RG 8196  
DA 19.000 usec  
DE 6.00 usec  
TE 300.0 K  
D1 0.1000000 sec  
d11 0.0300000 sec

----- CHANNEL f1 -----  
NUC1 13C  
P1 2.00 usec  
PL1 0.00 dB  
SFO1 100.626377 MHz

----- CHANNEL f2 -----  
CPOPRG2 waltz16  
NUC2 1H  
PCPD2 93.00 usec  
PL2 120.00 dB  
PL12 18.00 dB  
SFO2 400.2520012 MHz

F2 - Processing parameters

SI 32768  
SF 100.626377 MHz  
WDW EM  
SSB 0  
LB 1.00 Hz  
GB 0  
PC 1.40

1D NMR plot parameters

CX 23.50 cm  
CY 10.00 cm  
F1P 240.000 ppm  
F1 24154.31 Hz  
F2P -10.000 ppm  
F2 -1006.43 Hz  
PPMCM 10.63830 ppm/cm  
HZCM 1070.66980 Hz/cm

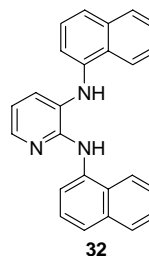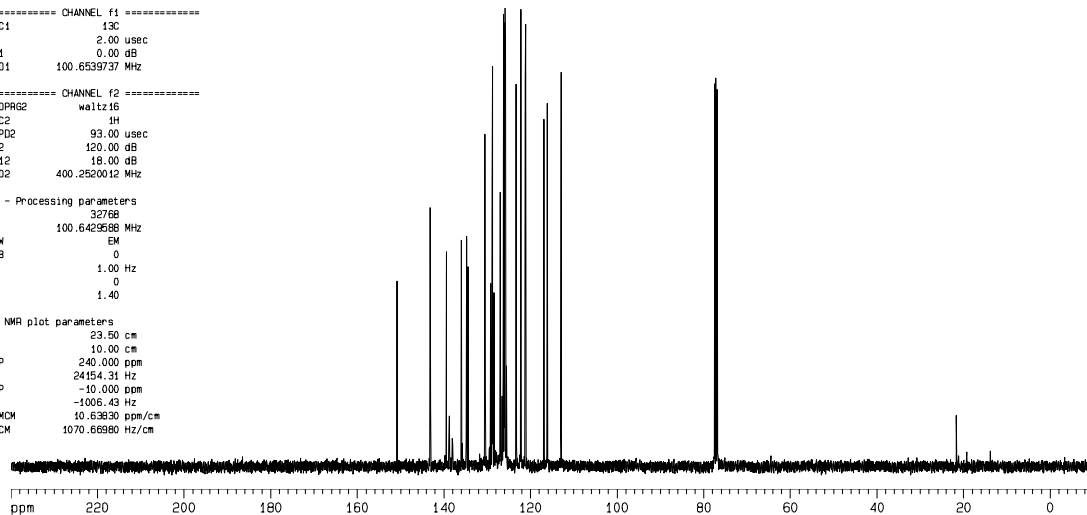

Supplement: Supplementary file 1 [file 5157178]
